# Supplementary material for: Water Extract from Inflorescences of Industrial Hemp Futura 75 Variety as a Source of Anti-Inflammatory, Anti-Proliferative and Antimycotic Agents: Results from In Silico, In Vitro and Ex Vivo Studies
Source: MDPI journal article supplement (doi:10.3390/antiox9050437), 2020-05-17
Supplement: s1 [file s1]

# SwissTargetPrediction

| Target                                     | Common name | Uniprot ID | ChEMBL ID     | Target Class                        | Probability*   | Known actives (3D/2D) |
|--------------------------------------------|-------------|------------|---------------|-------------------------------------|----------------|-----------------------|
| Carbonic anhydrase II                      | CA2         | P00918     | CHEMBL205     | Lyase                               | 1.0            | 5 / 49                |
| Carbonic anhydrase VII                     | CA7         | P43166     | CHEMBL2326    | Lyase                               | 1.0            | 3 / 26                |
| Carbonic anhydrase I                       | CA1         | P00915     | CHEMBL261     | Lyase                               | 1.0            | 5 / 47                |
| Carbonic anhydrase III                     | CA3         | P07451     | CHEMBL2885    | Lyase                               | 1.0            | 1 / 3                 |
| Carbonic anhydrase VI                      | CA6         | P23280     | CHEMBL3025    | Lyase                               | 1.0            | 2 / 5                 |
| Carbonic anhydrase XII                     | CA12        | O43570     | CHEMBL3242    | Lyase                               | 1.0            | 5 / 30                |
| Carbonic anhydrase XIV                     | CA14        | Q9ULX7     | CHEMBL3510    | Lyase                               | 1.0            | 3 / 26                |
| Carbonic anhydrase IX                      | CA9         | Q16790     | CHEMBL3594    | Lyase                               | 1.0            | 4 / 28                |
| Alpha-(1,3)-fucosyltransferase 7           | FUT7        | Q11130     | CHEMBL3596077 | Transferase                         | 1.0            | 1 / 2                 |
| Carbonic anhydrase IV                      | CA4         | P22748     | CHEMBL3729    | Lyase                               | 1.0            | 2 / 4                 |
| Carbonic anhydrase VB                      | CA5B        | Q9Y2D0     | CHEMBL3969    | Lyase                               | 1.0            | 1 / 2                 |
| Carbonic anhydrase VA                      | CA5A        | P35218     | CHEMBL4789    | Lyase                               | 1.0            | 1 / 3                 |
| Carbonic anhydrase XIII (by homology)      | CA13        | Q8N1Q1     | CHEMBL3912    | Lyase                               | 1.0            | 1 / 2                 |
| Squalene monooxygenase (by homology)       | SQLE        | Q14534     | CHEMBL3592    | Enzyme                              | 0.150097810701 | 0 / 7                 |
| L-lactate dehydrogenase A chain            | LDHA        | P00338     | CHEMBL4835    | Enzyme                              | 0.125075959828 | 0 / 14                |
| L-lactate dehydrogenase B chain            | LDHB        | P07195     | CHEMBL4940    | Enzyme                              | 0.125075959828 | 0 / 11                |
| Transthyretin                              | TTR         | P02766     | CHEMBL3194    | Secreted protein                    | 0.125075959828 | 0 / 8                 |
| Insulin-like growth factor I receptor      | IGF1R       | P08069     | CHEMBL1957    | Kinase                              | 0.125075959828 | 0 / 3                 |
| ALK tyrosine kinase receptor               | ALK         | Q9UM73     | CHEMBL4247    | Kinase                              | 0.125075959828 | 0 / 3                 |
| Plasminogen activator inhibitor-1          | SERPINE1    | P05121     | CHEMBL3475    | Secreted protein                    | 0.125075959828 | 0 / 8                 |
| Estrogen receptor beta                     | ESR2        | Q92731     | CHEMBL242     | Nuclear receptor                    | 0.125075959828 | 0 / 8                 |
| Apoptosis regulator Bcl-X                  | BCL2L1      | Q07817     | CHEMBL4625    | Other ion channel                   | 0.116739032206 | 0 / 2                 |
| G-protein coupled receptor 35              | GPR35       | Q9HC97     | CHEMBL1293267 | Family A G protein-coupled receptor | 0.116739032206 | 0 / 2                 |
| Catechol O-methyltransferase (by homology) | COMT        | P21964     | CHEMBL2023    | Transferase                         | 0.116739032206 | 0 / 7                 |
| Thiopurine S-methyltransferase             | TPMT        | P51580     | CHEMBL2500    | Enzyme                              | 0.116739032206 | 0 / 5                 |
| Aldo-keto-reductase family 1 member C3     | AKR1C3      | P42330     | CHEMBL4681    | Enzyme                              | 0.0            | 0 / 4                 |
| Serum albumin                              | ALB         | P02768     | CHEMBL3253    | Secreted protein                    | 0.0            | 0 / 5                 |
| Tyrosinase                                 | TYR         | P14679     | CHEMBL1973    | Oxidoreductase                      | 0.0            | 0 / 3                 |
| D-amino-acid oxidase                       | DAO         | P14920     | CHEMBL5485    | Enzyme                              | 0.0            | 0 / 1                 |
| Serine/threonine-protein kinase Aurora-B   | AURKB       | Q96GD4     | CHEMBL2185    | Kinase                              | 0.0            | 0 / 1                 |

| Target                                                      | Common name | Uniprot ID | ChEMBL ID     | Target Class                        | Probability* | Known actives (3D/2D) |
|-------------------------------------------------------------|-------------|------------|---------------|-------------------------------------|--------------|-----------------------|
| Tyrosine-protein kinase SRC                                 | SRC         | P12931     | CHEMBL267     | Kinase                              | 0.0          | 0 / 1                 |
| Focal adhesion kinase 1                                     | PTK2        | Q05397     | CHEMBL2695    | Kinase                              | 0.0          | 0 / 1                 |
| Vascular endothelial growth factor receptor 2               | KDR         | P35968     | CHEMBL279     | Kinase                              | 0.0          | 0 / 1                 |
| Hepatocyte growth factor receptor                           | MET         | P08581     | CHEMBL3717    | Kinase                              | 0.0          | 0 / 2                 |
| Serine/threonine-protein kinase NEK2                        | NEK2        | P51955     | CHEMBL3835    | Kinase                              | 0.0          | 0 / 1                 |
| Tyrosine-protein kinase receptor UFO                        | AXL         | P30530     | CHEMBL4895    | Kinase                              | 0.0          | 0 / 2                 |
| Steroid 5-alpha-reductase 2                                 | SRD5A2      | P31213     | CHEMBL1856    | Oxidoreductase                      | 0.0          | 0 / 13                |
| Aldo-keto reductase family 1 member C2                      | AKR1C2      | P52895     | CHEMBL5847    | Enzyme                              | 0.0          | 0 / 4                 |
| Aldo-keto reductase family 1 member C1                      | AKR1C1      | Q04828     | CHEMBL5905    | Enzyme                              | 0.0          | 0 / 4                 |
| Tyrosine-protein kinase FYN                                 | FYN         | P06241     | CHEMBL1841    | Kinase                              | 0.0          | 0 / 1                 |
| Tyrosine-protein kinase LCK                                 | LCK         | P06239     | CHEMBL258     | Kinase                              | 0.0          | 0 / 3                 |
| Cannabinoid receptor 2                                      | CNR2        | P34972     | CHEMBL253     | Family A G protein-coupled receptor | 0.0          | 0 / 5                 |
| DNA polymerase alpha subunit                                | POLA1       | P09884     | CHEMBL1828    | Transferase                         | 0.0          | 0 / 1                 |
| DNA polymerase beta                                         | POLB        | P06746     | CHEMBL2392    | Enzyme                              | 0.0          | 0 / 2                 |
| Estrogen receptor alpha                                     | ESR1        | P03372     | CHEMBL206     | Nuclear receptor                    | 0.0          | 0 / 5                 |
| Serine/threonine-protein kinase/endoribonuclease IRE1       | ERN1        | O75460     | CHEMBL1163101 | Enzyme                              | 0.0          | 0 / 34                |
| Poly [ADP-ribose] polymerase-1                              | PARP1       | P09874     | CHEMBL3105    | Enzyme                              | 0.0          | 0 / 1                 |
| Mevalonate pyrophosphate decarboxylase                      | MVD         | P53602     | CHEMBL4340    | Enzyme                              | 0.0          | 2 / 0                 |
| Tubulin beta-1 chain                                        | TUBB1       | Q9H4B7     | CHEMBL1915    | Structural protein                  | 0.0          | 0 / 2                 |
| Fatty acid synthase                                         | FASN        | P49327     | CHEMBL4158    | Transferase                         | 0.0          | 0 / 1                 |
| Thymidylate synthase                                        | TYMS        | P04818     | CHEMBL1952    | Transferase                         | 0.0          | 0 / 5                 |
| Induced myeloid leukemia cell differentiation protein Mcl-1 | MCL1        | Q07820     | CHEMBL4361    | Other cytosolic protein             | 0.0          | 0 / 9                 |
| Monoamine oxidase B                                         | MAOB        | P27338     | CHEMBL2039    | Oxidoreductase                      | 0.0          | 0 / 29                |
| Cyclin-dependent kinase 2                                   | CDK2        | P24941     | CHEMBL301     | Kinase                              | 0.0          | 0 / 1                 |
| Leukocyte elastase                                          | ELANE       | P08246     | CHEMBL248     | Protease                            | 0.0          | 0 / 1                 |
| Monoamine oxidase A                                         | MAOA        | P21397     | CHEMBL1951    | Oxidoreductase                      | 0.0          | 0 / 12                |
| Alpha-2a adrenergic                                         | ADRA2A      | P08913     | CHEMBL1867    | Family A G                          | 0.0          | 0 / 2                 |

| Target                                                        | Common name | Uniprot ID | ChEMBL ID     | Target Class                        | Probability* | Known actives (3D/2D) |
|---------------------------------------------------------------|-------------|------------|---------------|-------------------------------------|--------------|-----------------------|
| receptor                                                      |             |            |               | protein-coupled receptor            |              |                       |
| Adrenergic receptor alpha-2                                   | ADRA2C      | P18825     | CHEMBL1916    | Family A G protein-coupled receptor | 0.0          | 0 / 2                 |
| Alpha-2b adrenergic receptor (by homology)                    | ADRA2B      | P18089     | CHEMBL1942    | Family A G protein-coupled receptor | 0.0          | 0 / 2                 |
| Adrenergic receptor beta                                      | ADRB2       | P07550     | CHEMBL210     | Family A G protein-coupled receptor | 0.0          | 0 / 6                 |
| Beta-1 adrenergic receptor (by homology)                      | ADRB1       | P08588     | CHEMBL213     | Family A G protein-coupled receptor | 0.0          | 0 / 4                 |
| Dopamine D2 receptor                                          | DRD2        | P14416     | CHEMBL217     | Family A G protein-coupled receptor | 0.0          | 0 / 2                 |
| Alpha-1a adrenergic receptor                                  | ADRA1A      | P35348     | CHEMBL229     | Family A G protein-coupled receptor | 0.0          | 0 / 2                 |
| Retinoic acid receptor gamma                                  | RARG        | P13631     | CHEMBL2003    | Nuclear receptor                    | 0.0          | 0 / 3                 |
| Retinoic acid receptor beta                                   | RARB        | P10826     | CHEMBL2008    | Nuclear receptor                    | 0.0          | 0 / 3                 |
| Dual-specificity tyrosine-phosphorylation regulated kinase 1A | DYRK1A      | Q13627     | CHEMBL2292    | Kinase                              | 0.0          | 0 / 1                 |
| Dual specificity protein kinase CLK1                          | CLK1        | P49759     | CHEMBL4224    | Kinase                              | 0.0          | 0 / 1                 |
| Dual specificity tyrosine-phosphorylation-regulated kinase 1B | DYRK1B      | Q9Y463     | CHEMBL5543    | Kinase                              | 0.0          | 0 / 1                 |
| Corticotropin releasing factor receptor 1                     | CRHR1       | P34998     | CHEMBL1800    | Family B G protein-coupled receptor | 0.0          | 0 / 1                 |
| Dopamine D3 receptor                                          | DRD3        | P35462     | CHEMBL234     | Family A G protein-coupled receptor | 0.0          | 0 / 2                 |
| Protein-tyrosine phosphatase 1B                               | PTPN1       | P18031     | CHEMBL335     | Phosphatase                         | 0.0          | 0 / 3                 |
| Cyclooxygenase-2                                              | PTGS2       | P35354     | CHEMBL230     | Oxidoreductase                      | 0.0          | 0 / 2                 |
| Acetylcholinesterase                                          | ACHE        | P22303     | CHEMBL220     | Hydrolase                           | 0.0          | 0 / 3                 |
| Phospholipase A2 group 1VB                                    | PLA2G4B     | P0C869     | CHEMBL4136    | Enzyme                              | 0.0          | 0 / 9                 |
| Metabotropic glutamate receptor 2 (by homology)               | GRM2        | Q14416     | CHEMBL5137    | Family C G protein-coupled receptor | 0.0          | 0 / 10                |
| Lysine-specific demethylase 4D-like                           | KDM4E       | B2RXH2     | CHEMBL1293226 | Eraser                              | 0.0          | 0 / 3                 |
| Epidermal growth factor receptor erbB1                        | EGFR        | P00533     | CHEMBL203     | Kinase                              | 0.0          | 0 / 2                 |

| Target                                        | Common name | Uniprot ID | ChEMBL ID     | Target Class                        | Probability* | Known actives (3D/2D) |
|-----------------------------------------------|-------------|------------|---------------|-------------------------------------|--------------|-----------------------|
| Lysine-specific demethylase 4A                | KDM4A       | O75164     | CHEMBL5896    | Eraser                              | 0.0          | 0 / 2                 |
| Dipeptidyl peptidase IV                       | DPP4        | P27487     | CHEMBL284     | Protease                            | 0.0          | 0 / 1                 |
| Steryl-sulfatase                              | STS         | P08842     | CHEMBL3559    | Enzyme                              | 0.0          | 0 / 2                 |
| Succinate semialdehyde dehydrogenase          | ALDH5A1     | P51649     | CHEMBL1911    | Oxidoreductase                      | 0.0          | 0 / 1                 |
| Gamma-amino-N-butyrate transaminase           | ABAT        | P80404     | CHEMBL2044    | Transferase                         | 0.0          | 0 / 1                 |
| Cannabinoid receptor 1                        | CNR1        | P21554     | CHEMBL218     | Family A G protein-coupled receptor | 0.0          | 0 / 2                 |
| Lysine-specific demethylase 3A                | KDM3A       | Q9Y4C1     | CHEMBL1938209 | Eraser                              | 0.0          | 0 / 1                 |
| Lysine-specific demethylase 6B                | KDM6B       | O15054     | CHEMBL1938211 | Eraser                              | 0.0          | 0 / 1                 |
| Alpha-ketoglutarate-dependent dioxygenase FTO | FTO         | Q9C0B1     | CHEMBL2331065 | Oxidoreductase                      | 0.0          | 0 / 1                 |
| Lysine-specific demethylase 4C                | KDM4C       | Q9H3R0     | CHEMBL6175    | Eraser                              | 0.0          | 0 / 1                 |
| Apoptosis regulator Bcl-2                     | BCL2        | P10415     | CHEMBL4860    | Other ion channel                   | 0.0          | 0 / 5                 |
| Alpha-1d adrenergic receptor                  | ADRA1D      | P25100     | CHEMBL223     | Family A G protein-coupled receptor | 0.0          | 0 / 1                 |
| Mu opioid receptor (by homology)              | OPRM1       | P35372     | CHEMBL233     | Family A G protein-coupled receptor | 0.0          | 0 / 1                 |
| Estradiol 17-beta-dehydrogenase 1             | HSD17B1     | P14061     | CHEMBL3181    | Enzyme                              | 0.0          | 0 / 2                 |
| Equilibrative nucleoside transporter 1        | SLC29A1     | Q99808     | CHEMBL1997    | Electrochemical transporter         | 0.0          | 0 / 3                 |
| Indoleamine 2,3-dioxygenase                   | IDO1        | P14902     | CHEMBL4685    | Enzyme                              | 0.0          | 0 / 1                 |
| Cytochrome P450 19A1                          | CYP19A1     | P11511     | CHEMBL1978    | Cytochrome P450                     | 0.0          | 0 / 1                 |
| Cyclooxygenase-1                              | PTGS1       | P23219     | CHEMBL221     | Oxidoreductase                      | 0.0          | 0 / 1                 |
| Retinoid X receptor beta                      | RXRB        | P28702     | CHEMBL1870    | Nuclear receptor                    | 0.0          | 0 / 1                 |
| Retinoid X receptor gamma                     | RXRG        | P48443     | CHEMBL2004    | Nuclear receptor                    | 0.0          | 0 / 1                 |
| Retinoid X receptor alpha                     | RXRA        | P19793     | CHEMBL2061    | Nuclear receptor                    | 0.0          | 0 / 1                 |
| Glutamate carboxypeptidase II                 | FOLH1       | Q04609     | CHEMBL1892    | Protease                            | 0.0          | 0 / 1                 |
| Serotonin 3a (5-HT3a) receptor                | HTR3A       | P46098     | CHEMBL1899    | Ligand-gated ion channel            | 0.0          | 0 / 1                 |
