# Supplementary material for: Water Extract from Inflorescences of Industrial Hemp Futura 75 Variety as a Source of Anti-Inflammatory, Anti-Proliferative and Antimycotic Agents: Results from In Silico, In Vitro and Ex Vivo Studies
Source: MDPI journal article supplement (doi:10.3390/antiox9050437), 2020-05-17
Supplement: s1 [file s1]

# SwissTargetPrediction

| Target                                                                         | Common name | Uniprot ID | ChEMBL ID     | Target Class                        | Probability*    | Known actives (3D/2D) |
|--------------------------------------------------------------------------------|-------------|------------|---------------|-------------------------------------|-----------------|-----------------------|
| Cyclooxygenase-1 (by homology)                                                 | Ptgs1       | P22437     | CHEMBL2649    | Enzyme                              | 1.0             | 29 / 10               |
| Transient receptor potential cation channel subfamily A member 1 (by homology) | Trpa1       | Q8BLA8     | CHEMBL1075310 | Voltage-gated ion channel           | 0.245005854395  | 4 / 1                 |
| Histone deacetylase 6 (by homology)                                            | Hdac6       | Q9Z2V5     | CHEMBL2878    | Eraser                              | 0.053517944289  | 5 / 0                 |
| Androgen Receptor (by homology)                                                | Ar          | P19091     | CHEMBL3056    | Nuclear receptor                    | 0.0439186325197 | 20 / 9                |
| Serine/threonine-protein kinase Aurora-A (by homology)                         | Aurka       | P97477     | CHEMBL2211    | Kinase                              | 0.0439186325197 | 5 / 0                 |
| Dopamine transporter (by homology)                                             | Slc6a3      | Q61327     | CHEMBL2799    | Electrochemical transporter         | 0.0439186325197 | 4 / 12                |
| Tyrosinase (by homology)                                                       | Tyr         | P11344     | CHEMBL5346    | Oxidoreductase                      | 0.0439186325197 | 2 / 8                 |
| Indoleamine 2,3-dioxygenase 1 (by homology)                                    | Ido1        | P28776     | CHEMBL1075294 | Enzyme                              | 0.0439186325197 | 12 / 0                |
| 11-beta-hydroxysteroid dehydrogenase 1                                         | Hsd11b1     | P50172     | CHEMBL3910    | Enzyme                              | 0.0439186325197 | 29 / 0                |
| Histone deacetylase 8 (by homology)                                            | Hdac8       | Q8VH37     | CHEMBL2347    | Eraser                              | 0.0439186325197 | 9 / 4                 |
| Melanocortin receptor 4 (by homology)                                          | Mc4r        | P56450     | CHEMBL3719    | Family A G protein-coupled receptor | 0.0439186325197 | 1 / 0                 |
| Nitric-oxide synthase, endothelial (by homology)                               | Nos3        | P70313     | CHEMBL2643    | Enzyme                              | 0.0439186325197 | 8 / 0                 |
| Muscarinic acetylcholine receptor M2 (by homology)                             | Chrm2       | Q9ERZ4     | CHEMBL3197    | Family A G protein-coupled receptor | 0.0439186325197 | 3 / 1                 |
| Muscarinic acetylcholine receptor M1 (by homology)                             | Chrm1       | P12657     | CHEMBL3733    | Family A G protein-coupled receptor | 0.0439186325197 | 3 / 1                 |
| Alkaline phosphatase tissue-nonspecific (by homology)                          | Alpl        | P09242     | CHEMBL2660    | Enzyme                              | 0.0             | 5 / 0                 |
| Mitogen-activated protein kinase 9 (by homology)                               | Mapk9       | Q9WTU6     | CHEMBL2034797 | Kinase                              | 0.0             | 3 / 0                 |
| Norepinephrine transporter (by homology)                                       | Slc6a2      | O55192     | CHEMBL2370    | Electrochemical transporter         | 0.0             | 2 / 4                 |
| Cannabinoid CB1                                                                | Cnr1        | P47746     | CHEMBL3037    | Family A G protein-                 | 0.0             | 8 / 34                |

| Target                                                  | Common name | Uniprot ID | ChEMBL ID     | Target Class                        | Probability* | Known actives (3D/2D) |
|---------------------------------------------------------|-------------|------------|---------------|-------------------------------------|--------------|-----------------------|
| receptor (by homology)                                  |             |            |               | coupled receptor                    |              |                       |
| Histone deacetylase 1 (by homology)                     | Hdac1       | O09106     | CHEMBL4001    | Eraser                              | 0.0          | 7 / 0                 |
| Arachidonate 12-lipoxygenase (by homology)              | Alox12      | P39655     | CHEMBL3225    | Enzyme                              | 0.0          | 0 / 7                 |
| Dual specificity protein kinase CLK1 (by homology)      | Clk1        | P22518     | CHEMBL1075280 | Enzyme                              | 0.0          | 0 / 1                 |
| DNA polymerase beta (by homology)                       | Polb        | Q8K409     | CHEMBL4565    | Enzyme                              | 0.0          | 0 / 3                 |
| Serotonin 2c (5-HT2c) receptor (by homology)            | Htr2c       | P34968     | CHEMBL3006    | Family A G protein-coupled receptor | 0.0          | 8 / 3                 |
| Dopamine D1 receptor (by homology)                      | Drd1        | Q61616     | CHEMBL3071    | Family A G protein-coupled receptor | 0.0          | 8 / 2                 |
| Platelet-derived growth factor receptor                 | Pdgfrb      | P05622     | CHEMBL2749    | Kinase                              | 0.0          | 2 / 0                 |
| RAC-alpha serine/threonine-protein kinase (by homology) | Akt1        | P31750     | CHEMBL5859    | Kinase                              | 0.0          | 6 / 0                 |
| Acetylcholinesterase (by homology)                      | Ache        | P21836     | CHEMBL3198    | Hydrolase                           | 0.0          | 10 / 8                |
| D-amino-acid oxidase (by homology)                      | Dao         | P18894     | CHEMBL2331068 | Enzyme                              | 0.0          | 5 / 0                 |
| Epoxide hydratase (by homology)                         | Ephx2       | P34914     | CHEMBL4140    | Protease                            | 0.0          | 30 / 0                |
| Testosterone 17-beta-dehydrogenase 3 (by homology)      | Hsd17b3     | P70385     | CHEMBL1932905 | Enzyme                              | 0.0          | 4 / 0                 |
| Tyrosine-protein kinase JAK3 (by homology)              | Jak3        | Q62137     | CHEMBL5250    | Kinase                              | 0.0          | 15 / 0                |
| Dopamine D2 receptor (by homology)                      | Drd2        | P61168     | CHEMBL3427    | Family A G protein-coupled receptor | 0.0          | 6 / 43                |
| Beta-1 adrenergic receptor (by homology)                | Adrb1       | P34971     | CHEMBL3440    | Family A G protein-coupled receptor | 0.0          | 0 / 8                 |
| Beta-2 adrenergic receptor (by homology)                | Adrb2       | P18762     | CHEMBL3707    | Family A G protein-coupled receptor | 0.0          | 0 / 21                |
| Estrogen receptor beta (by homology)                    | Esr2        | O08537     | CHEMBL2995    | Nuclear receptor                    | 0.0          | 24 / 66               |
| Histamine H4 receptor (by homology)                     | Hrh4        | Q91ZY2     | CHEMBL5657    | Family A G protein-coupled receptor | 0.0          | 31 / 0                |
| C-C chemokine receptor type 2 (by homology)             | Ccr2        | P51683     | CHEMBL5412    | Family A G protein-coupled receptor | 0.0          | 2 / 0                 |

| Target                                                 | Common name | Uniprot ID | ChEMBL ID     | Target Class                        | Probability* | Known actives (3D/2D) |
|--------------------------------------------------------|-------------|------------|---------------|-------------------------------------|--------------|-----------------------|
| Epoxide hydrolase 1 (by homology)                      | Ephx1       | Q9D379     | CHEMBL1075293 | Protease                            | 0.0          | 10 / 0                |
| Cathepsin K (by homology)                              | Ctsk        | P55097     | CHEMBL1075277 | Protease                            | 0.0          | 11 / 0                |
| Estrogen receptor alpha (by homology)                  | Esr1        | P19785     | CHEMBL3065    | Nuclear receptor                    | 0.0          | 22 / 63               |
| Monoamine oxidase A (by homology)                      | Maoa        | Q64133     | CHEMBL3681    | Enzyme                              | 0.0          | 7 / 2                 |
| Serotonin transporter (by homology)                    | Slc6a4      | Q60857     | CHEMBL4642    | Electrochemical transporter         | 0.0          | 4 / 6                 |
| Thrombin (by homology)                                 | F2          | P19221     | CHEMBL1075308 | Protease                            | 0.0          | 2 / 0                 |
| Catechol O-methyltransferase (by homology)             | Comt        | O88587     | CHEMBL3286068 | Transferase                         | 0.0          | 0 / 2                 |
| ADP-ribosyl cyclase/ cyclic ADP-ribose hydrolase 1     | Cd38        | P56528     | CHEMBL3425388 | Enzyme                              | 0.0          | 11 / 0                |
| Monoglyceride lipase (by homology)                     | Mgll        | O35678     | CHEMBL5774    | Enzyme                              | 0.0          | 2 / 0                 |
| Butyrylcholinesterase (by homology)                    | Bche        | Q03311     | CHEMBL2528    | Hydrolase                           | 0.0          | 3 / 0                 |
| Inosine-5'-monophosphate dehydrogenase 2 (by homology) | Impdh2      | P24547     | CHEMBL3169    | Oxidoreductase                      | 0.0          | 7 / 0                 |
| Beta-3 adrenergic receptor (by homology)               | Adrb3       | P25962     | CHEMBL4030    | Family A G protein-coupled receptor | 0.0          | 0 / 3                 |
| Serine/threonine-protein kinase B-raf (by homology)    | Braf        | P28028     | CHEMBL2331061 | Kinase                              | 0.0          | 10 / 0                |
| 5,6-dihydroxyindole-2-carboxylic acid oxidase          | Tyrp1       | P07147     | CHEMBL3638355 | Oxidoreductase                      | 0.0          | 0 / 1                 |
| Delta opioid receptor (by homology)                    | Oprd1       | P32300     | CHEMBL3222    | Family A G protein-coupled receptor | 0.0          | 5 / 16                |
| Adenosine A1 receptor (by homology)                    | Adora1      | Q60612     | CHEMBL3688    | Family A G protein-coupled receptor | 0.0          | 5 / 0                 |
| Tyrosine-protein kinase FYN (by homology)              | Fyn         | P39688     | CHEMBL4517    | Kinase                              | 0.0          | 0 / 3                 |
| Metabotropic glutamate receptor 5 (by homology)        | Grm5        | Q3UVX5     | CHEMBL1641352 | Family C G protein-coupled receptor | 0.0          | 6 / 0                 |
| Fatty acid synthase (by homology)                      | Fasn        | P19096     | CHEMBL1795189 | Transferase                         | 0.0          | 0 / 1                 |
| Glycogen synthase kinase-3 beta (by homology)          | Gsk3b       | Q9WV60     | CHEMBL1075321 | Kinase                              | 0.0          | 11 / 0                |
| MAP kinase p38 alpha (by homology)                     | Mapk14      | P47811     | CHEMBL2336    | Kinase                              | 0.0          | 7 / 0                 |

| Target                                                                      | Common name | Uniprot ID | ChEMBL ID     | Target Class                        | Probability* | Known actives (3D/2D) |
|-----------------------------------------------------------------------------|-------------|------------|---------------|-------------------------------------|--------------|-----------------------|
| Arachidonate 5-lipoxygenase                                                 | Alox5       | P48999     | CHEMBL5211    | Oxidoreductase                      | 0.0          | 3 / 8                 |
| Serine/threonine-protein kinase 12 (by homology)                            | Aurkb       | O70126     | CHEMBL1075275 | Kinase                              | 0.0          | 4 / 0                 |
| Glycogen synthase kinase-3 alpha (by homology)                              | Gsk3a       | Q2NL51     | CHEMBL2176843 | Kinase                              | 0.0          | 2 / 0                 |
| Protein kinase C delta (by homology)                                        | Prkcd       | P28867     | CHEMBL2560    | Kinase                              | 0.0          | 7 / 0                 |
| Heat shock protein HSP 90-alpha (by homology)                               | Hsp90aa1    | P07901     | CHEMBL4197    | Other cytosolic protein             | 0.0          | 2 / 0                 |
| Protein kinase C theta type (by homology)                                   | Prkcq       | Q02111     | CHEMBL1075295 | Kinase                              | 0.0          | 10 / 0                |
| Mu opioid receptor (by homology)                                            | Oprm1       | P42866     | CHEMBL2858    | Family A G protein-coupled receptor | 0.0          | 4 / 59                |
| Kappa opioid receptor (by homology)                                         | Oprk1       | P33534     | CHEMBL4329    | Family A G protein-coupled receptor | 0.0          | 2 / 22                |
| Thymidylate synthase (by homology)                                          | Tyms        | P07607     | CHEMBL3160    | Transferase                         | 0.0          | 10 / 0                |
| High affinity cAMP-specific 3',5'-cyclic phosphodiesterase 7A (by homology) | Pde7a       | P70453     | CHEMBL2040702 | Phosphodiesterase                   | 0.0          | 8 / 0                 |
| Nitric oxide synthase, inducible (by homology)                              | Nos2        | P29477     | CHEMBL3464    | Enzyme                              | 0.0          | 6 / 0                 |
| Cannabinoid CB2 receptor (by homology)                                      | Cnr2        | P47936     | CHEMBL5373    | Family A G protein-coupled receptor | 0.0          | 5 / 30                |
| Tyrosine-protein kinase ABL (by homology)                                   | Abl1        | P00520     | CHEMBL3099    | Kinase                              | 0.0          | 1 / 0                 |
| Vascular endothelial growth factor receptor 2                               | Kdr         | P35918     | CHEMBL3337    | Kinase                              | 0.0          | 2 / 0                 |
| Nuclear receptor ROR-gamma (by homology)                                    | Rorc        | P51450     | CHEMBL1293231 | Nuclear receptor                    | 0.0          | 0 / 1                 |
| Peripheral-type benzodiazepine receptor (by homology)                       | Tspo        | P50637     | CHEMBL2149    | Membrane receptor                   | 0.0          | 6 / 0                 |
| G-protein coupled bile acid receptor 1                                      | Gpbar1      | Q80SS6     | CHEMBL1255150 | Family A G protein-coupled receptor | 0.0          | 2 / 0                 |
| Serotonin 4 (5-HT4) receptor (by homology)                                  | Htr4        | P97288     | CHEMBL2183    | Family A G protein-coupled receptor | 0.0          | 4 / 0                 |
| TGF-beta receptor type-1 (by                                                | Tgfbr1      | Q64729     | CHEMBL2021750 | Kinase                              | 0.0          | 1 / 0                 |

| Target                                                           | Common name | Uniprot ID | ChEMBL ID     | Target Class                        | Probability* | Known actives (3D/2D) |
|------------------------------------------------------------------|-------------|------------|---------------|-------------------------------------|--------------|-----------------------|
| homology)                                                        |             |            |               |                                     |              |                       |
| Vascular endothelial growth factor receptor 1 (by homology)      | Flt1        | P35969     | CHEMBL3516    | Kinase                              | 0.0          | 4 / 0                 |
| RAF proto-oncogene serine/threonine-protein kinase (by homology) | Raf1        | Q99N57     | CHEMBL3804748 | Kinase                              | 0.0          | 2 / 0                 |
| Urotensin-2 receptor (by homology)                               | Uts2r       | Q8VIH9     | CHEMBL2346494 | Family A G protein-coupled receptor | 0.0          | 1 / 0                 |
| Methionine aminopeptidase 2 (by homology)                        | Metap2      | O08663     | CHEMBL1075272 | Protease                            | 0.0          | 4 / 0                 |
| Tyrosine-protein kinase Lyn (by homology)                        | Lyn         | P25911     | CHEMBL2258    | Kinase                              | 0.0          | 1 / 0                 |
| Beta-secretase 1 (by homology)                                   | Bace1       | P56818     | CHEMBL4593    | Protease                            | 0.0          | 5 / 0                 |
| Trace amine-associated receptor 1                                | Taar1       | Q923Y8     | CHEMBL4908    | Family A G protein-coupled receptor | 0.0          | 47 / 5                |
| Histamine H1 receptor (by homology)                              | Hrh1        | P70174     | CHEMBL4322    | Family A G protein-coupled receptor | 0.0          | 4 / 0                 |
| Bombesin receptor subtype-3 (by homology)                        | Brs3        | O54798     | CHEMBL1075140 | Family A G protein-coupled receptor | 0.0          | 1 / 0                 |
| Estradiol 17-beta-dehydrogenase 2 (by homology)                  | Hsd17b2     | P51658     | CHEMBL1914270 | Enzyme                              | 0.0          | 4 / 14                |
| HMG-CoA reductase (by homology)                                  | Hmgcr       | Q01237     | CHEMBL2764    | Oxidoreductase                      | 0.0          | 0 / 1                 |
| Prostanoid EP1 receptor (by homology)                            | Ptger1      | P35375     | CHEMBL2181    | Family A G protein-coupled receptor | 0.0          | 2 / 0                 |
| Ribosomal protein S6 kinase alpha-3 (by homology)                | Rps6ka3     | P18654     | CHEMBL3297641 | Enzyme                              | 0.0          | 1 / 0                 |
| Matrix metalloproteinase 9 (by homology)                         | Mmp9        | P41245     | CHEMBL2214    | Protease                            | 0.0          | 1 / 0                 |
| Matrix metalloproteinase-2 (by homology)                         | Mmp2        | P33434     | CHEMBL3095    | Protease                            | 0.0          | 1 / 0                 |
| Collagenase 3 (by homology)                                      | Mmp13       | P33435     | CHEMBL3638350 | Hydrolase                           | 0.0          | 1 / 0                 |
| Neuronal acetylcholine receptor protein alpha-4 subunit          | Chrna4      | O70174     | CHEMBL4457    | Ligand-gated ion channel            | 0.0          | 2 / 0                 |
| Amine oxidase, copper containing (by homology)                   | Aoc3        | O70423     | CHEMBL4727    | Enzyme                              | 0.0          | 0 / 2                 |
| P2X purinoceptor 7                                               | P2rx7       | Q9Z1M0     | CHEMBL5183    | Ligand-gated ion                    | 0.0          | 1 / 0                 |

| Target                               | Common name | Uniprot ID | ChEMBL ID  | Target Class                        | Probability* | Known actives (3D/2D) |
|--------------------------------------|-------------|------------|------------|-------------------------------------|--------------|-----------------------|
|                                      |             |            |            | channel                             |              |                       |
| Adenosine A2a receptor (by homology) | Adora2a     | Q60613     | CHEMBL2115 | Family A G protein-coupled receptor | 0.0          | 2 / 0                 |
| Uridine phosphorylase 1              | Upp1        | P52624     | CHEMBL3718 | Enzyme                              | 0.0          | 2 / 0                 |
| Glucagon receptor                    | Gcgr        | Q61606     | CHEMBL4773 | Family B G protein-coupled receptor | 0.0          | 1 / 0                 |
| MAP kinase ERK2 (by homology)        | Mapk1       | P63085     | CHEMBL2207 | Kinase                              | 0.0          | 3 / 0                 |
