# Supplementary material for: Water Extract from Inflorescences of Industrial Hemp Futura 75 Variety as a Source of Anti-Inflammatory, Anti-Proliferative and Antimycotic Agents: Results from In Silico, In Vitro and Ex Vivo Studies
Source: MDPI journal article supplement (doi:10.3390/antiox9050437), 2020-05-17
Supplement: s1 [file s1]

# SwissTargetPrediction

| Target                                                           | Common name                | Uniprot ID                 | ChEMBL ID     | Target Class                        | Probability*    | Known actives (3D/2D) |
|------------------------------------------------------------------|----------------------------|----------------------------|---------------|-------------------------------------|-----------------|-----------------------|
| Cyclooxygenase-1                                                 | PTGS1                      | P23219                     | CHEMBL221     | Oxidoreductase                      | 1.0             | 29 / 10               |
| Transient receptor potential cation channel subfamily A member 1 | TRPA1                      | O75762                     | CHEMBL6007    | Voltage-gated ion channel           | 0.245005854395  | 4 / 1                 |
| Serotonin 2b (5-HT2b) receptor                                   | HTR2B                      | P41595                     | CHEMBL1833    | Family A G protein-coupled receptor | 0.053517944289  | 8 / 3                 |
| Carbonic anhydrase II                                            | CA2                        | P00918                     | CHEMBL205     | Lyase                               | 0.053517944289  | 76 / 17               |
| GABA-A receptor; alpha-1/beta-3/gamma-2                          | GABRB3<br>GABRG2<br>GABRA1 | P28472<br>P18507<br>P14867 | CHEMBL2094121 | Ligand-gated ion channel            | 0.053517944289  | 0 / 1                 |
| Histone deacetylase 6                                            | HDAC6                      | Q9UBN7                     | CHEMBL1865    | Eraser                              | 0.053517944289  | 5 / 0                 |
| Carbonic anhydrase IV                                            | CA4                        | P22748                     | CHEMBL3729    | Lyase                               | 0.053517944289  | 4 / 2                 |
| Serum albumin                                                    | ALB                        | P02768                     | CHEMBL3253    | Secreted protein                    | 0.0439186325197 | 0 / 5                 |
| Androgen Receptor                                                | AR                         | P10275                     | CHEMBL1871    | Nuclear receptor                    | 0.0439186325197 | 20 / 9                |
| Cytochrome P450 19A1                                             | CYP19A1                    | P11511                     | CHEMBL1978    | Cytochrome P450                     | 0.0439186325197 | 48 / 14               |
| Tyrosine-protein kinase JAK1                                     | JAK1                       | P23458                     | CHEMBL2835    | Kinase                              | 0.0439186325197 | 14 / 0                |
| Tyrosine-protein kinase JAK2                                     | JAK2                       | O60674                     | CHEMBL2971    | Kinase                              | 0.0439186325197 | 27 / 0                |
| Protein kinase C alpha                                           | PRKCA                      | P17252                     | CHEMBL299     | Kinase                              | 0.0439186325197 | 2 / 0                 |
| Serine/threonine-protein kinase Aurora-A                         | AURKA                      | O14965                     | CHEMBL4722    | Kinase                              | 0.0439186325197 | 5 / 0                 |
| Dopamine transporter                                             | SLC6A3                     | Q01959                     | CHEMBL238     | Electrochemical transporter         | 0.0439186325197 | 4 / 12                |
| Tyrosine-protein kinase receptor FLT3                            | FLT3                       | P36888                     | CHEMBL1974    | Kinase                              | 0.0439186325197 | 5 / 0                 |
| Tyrosinase                                                       | TYR                        | P14679                     | CHEMBL1973    | Oxidoreductase                      | 0.0439186325197 | 2 / 8                 |
| Dopamine D5 receptor                                             | DRD5                       | P21918                     | CHEMBL1850    | Family A G protein-coupled receptor | 0.0439186325197 | 0 / 2                 |
| Dopamine D3 receptor                                             | DRD3                       | P35462                     | CHEMBL234     | Family A G protein-coupled receptor | 0.0439186325197 | 0 / 15                |
| 11-beta-hydroxysteroid dehydrogenase 1                           | HSD11B1                    | P28845                     | CHEMBL4235    | Enzyme                              | 0.0439186325197 | 29 / 0                |
| Indoleamine 2,3-dioxygenase                                      | IDO1                       | P14902                     | CHEMBL4685    | Enzyme                              | 0.0439186325197 | 12 / 0                |
| Histone deacetylase 8                                            | HDAC8                      | Q9BY41                     | CHEMBL3192    | Eraser                              | 0.0439186325197 | 9 / 4                 |
| Estrogen-related receptor gamma                                  | ESRRG                      | P62508                     | CHEMBL4245    | Nuclear receptor                    | 0.0439186325197 | 0 / 1                 |
| Melanocortin receptor 4                                          | MC4R                       | P32245                     | CHEMBL259     | Family A G protein-coupled receptor | 0.0439186325197 | 1 / 0                 |
| Nitric-oxide synthase, brain                                     | NOS1                       | P29475                     | CHEMBL3568    | Enzyme                              | 0.0439186325197 | 13 / 0                |

| Target                                              | Common name                | Uniprot ID                 | ChEMBL ID     | Target Class                        | Probability*    | Known actives (3D/2D) |
|-----------------------------------------------------|----------------------------|----------------------------|---------------|-------------------------------------|-----------------|-----------------------|
| Nitric-oxide synthase, endothelial                  | NOS3                       | P29474                     | CHEMBL4803    | Enzyme                              | 0.0439186325197 | 8 / 0                 |
| Muscarinic acetylcholine receptor M2                | CHRM2                      | P08172                     | CHEMBL211     | Family A G protein-coupled receptor | 0.0439186325197 | 3 / 1                 |
| Muscarinic acetylcholine receptor M1                | CHRM1                      | P11229                     | CHEMBL216     | Family A G protein-coupled receptor | 0.0439186325197 | 3 / 1                 |
| Microtubule-associated protein 2                    | MAP2                       | P11137                     | CHEMBL2390810 | Unclassified protein                | 0.0             | 7 / 0                 |
| Acid ceramidase                                     | ASAH1                      | Q13510                     | CHEMBL5463    | Enzyme                              | 0.0             | 8 / 0                 |
| Alkaline phosphatase, tissue-nonspecific isozyme    | ALPL                       | P05186                     | CHEMBL5979    | Enzyme                              | 0.0             | 5 / 0                 |
| Microtubule-associated protein tau                  | MAPT                       | P10636                     | CHEMBL1293224 | Unclassified protein                | 0.0             | 0 / 1                 |
| c-Jun N-terminal kinase 3                           | MAPK10                     | P53779                     | CHEMBL2637    | Kinase                              | 0.0             | 7 / 0                 |
| GABA-A receptor; alpha-1/beta-2/gamma-2             | GABRA1<br>GABRB2<br>GABRG2 | P14867<br>P47870<br>P18507 | CHEMBL2095172 | Ligand-gated ion channel            | 0.0             | 2 / 3                 |
| c-Jun N-terminal kinase 1                           | MAPK8                      | P45983                     | CHEMBL2276    | Kinase                              | 0.0             | 7 / 0                 |
| c-Jun N-terminal kinase 2                           | MAPK9                      | P45984                     | CHEMBL4179    | Kinase                              | 0.0             | 3 / 0                 |
| NAD-dependent deacetylase sirtuin 2                 | SIRT2                      | Q8IXJ6                     | CHEMBL4462    | Eraser                              | 0.0             | 11 / 0                |
| Norepinephrine transporter                          | SLC6A2                     | P23975                     | CHEMBL222     | Electrochemical transporter         | 0.0             | 2 / 4                 |
| Cannabinoid receptor 1                              | CNR1                       | P21554                     | CHEMBL218     | Family A G protein-coupled receptor | 0.0             | 8 / 34                |
| Histone deacetylase 3                               | HDAC3                      | Q15379                     | CHEMBL1829    | Eraser                              | 0.0             | 3 / 0                 |
| Histone deacetylase 1                               | HDAC1                      | Q13547                     | CHEMBL325     | Eraser                              | 0.0             | 7 / 0                 |
| Histone deacetylase 11                              | HDAC11                     | Q96DB2                     | CHEMBL3310    | Eraser                              | 0.0             | 2 / 0                 |
| Histone deacetylase 10                              | HDAC10                     | Q969S8                     | CHEMBL5103    | Eraser                              | 0.0             | 2 / 0                 |
| Arachidonate 12-lipoxygenase                        | ALOX12                     | P18054                     | CHEMBL3687    | Enzyme                              | 0.0             | 0 / 7                 |
| Leukotriene B4 receptor 1                           | LTB4R                      | Q15722                     | CHEMBL3911    | Family A G protein-coupled receptor | 0.0             | 0 / 1                 |
| Dual specificity protein kinase CLK1                | CLK1                       | P49759                     | CHEMBL4224    | Kinase                              | 0.0             | 0 / 1                 |
| DNA polymerase beta (by homology)                   | POLB                       | P06746                     | CHEMBL2392    | Enzyme                              | 0.0             | 0 / 3                 |
| Serotonin 2c (5-HT2c) receptor                      | HTR2C                      | P28335                     | CHEMBL225     | Family A G protein-coupled receptor | 0.0             | 8 / 3                 |
| Calcium-activated potassium channel subunit alpha-1 | KCNMA1                     | Q12791                     | CHEMBL4304    | Voltage-gated ion channel           | 0.0             | 7 / 0                 |

| Target                                         | Common name             | Uniprot ID                 | ChEMBL ID     | Target Class                        | Probability* | Known actives (3D/2D) |
|------------------------------------------------|-------------------------|----------------------------|---------------|-------------------------------------|--------------|-----------------------|
| Glyceraldehyde-3-phosphate dehydrogenase liver | GAPDH                   | P04406                     | CHEMBL2284    | Oxidoreductase                      | 0.0          | 0 / 1                 |
| Tubulin beta-1 chain                           | TUBB1                   | Q9H4B7                     | CHEMBL1915    | Structural protein                  | 0.0          | 3 / 0                 |
| Dopamine D1 receptor                           | DRD1                    | P21728                     | CHEMBL2056    | Family A G protein-coupled receptor | 0.0          | 8 / 2                 |
| Dual specificity protein phosphatase 3         | DUSP3                   | P51452                     | CHEMBL2635    | Phosphatase                         | 0.0          | 4 / 0                 |
| Serine/threonine-protein kinase AKT            | AKT1                    | P31749                     | CHEMBL4282    | Kinase                              | 0.0          | 6 / 0                 |
| G-protein coupled receptor 84                  | GPR84                   | Q9NQS5                     | CHEMBL3714079 | Family A G protein-coupled receptor | 0.0          | 8 / 0                 |
| Acetylcholinesterase                           | ACHE                    | P22303                     | CHEMBL220     | Hydrolase                           | 0.0          | 10 / 8                |
| D-amino-acid oxidase                           | DAO                     | P14920                     | CHEMBL5485    | Enzyme                              | 0.0          | 5 / 0                 |
| Epoxide hydratase                              | EPHX2                   | P34913                     | CHEMBL2409    | Protease                            | 0.0          | 30 / 0                |
| Nischarin                                      | NISCH                   | Q9Y2I1                     | CHEMBL3923    | Other cytosolic protein             | 0.0          | 27 / 0                |
| Lysine-specific demethylase 4D-like            | KDM4E                   | B2RXH2                     | CHEMBL1293226 | Eraser                              | 0.0          | 1 / 2                 |
| Estradiol 17-beta-dehydrogenase 3              | HSD17B3                 | P37058                     | CHEMBL4234    | Enzyme                              | 0.0          | 4 / 0                 |
| Tyrosine-protein kinase JAK3                   | JAK3                    | P52333                     | CHEMBL2148    | Kinase                              | 0.0          | 15 / 0                |
| Dopamine D2 receptor                           | DRD2                    | P14416                     | CHEMBL217     | Family A G protein-coupled receptor | 0.0          | 6 / 43                |
| Dopamine D4 receptor                           | DRD4                    | P21917                     | CHEMBL219     | Family A G protein-coupled receptor | 0.0          | 1 / 5                 |
| Cytochrome P450 11B1                           | CYP11B1                 | P15538                     | CHEMBL1908    | Cytochrome P450                     | 0.0          | 10 / 0                |
| Cyclin-dependent kinase 2/cyclin A             | CDK2<br>CCNA1<br>CCNA2  | P24941<br>P78396<br>P20248 | CHEMBL2094128 | Other cytosolic protein             | 0.0          | 3 / 0                 |
| Troponin, cardiac muscle                       | TNNC1<br>TNNT2<br>TNNI3 | P63316<br>P45379<br>P19429 | CHEMBL2095202 | Unclassified protein                | 0.0          | 1 / 0                 |
| Cyclin-dependent kinase 2                      | CDK2                    | P24941                     | CHEMBL301     | Kinase                              | 0.0          | 6 / 0                 |
| Tyrosine-protein kinase BRK                    | PTK6                    | Q13882                     | CHEMBL4601    | Kinase                              | 0.0          | 6 / 0                 |
| Adrenergic receptor beta                       | ADRB2                   | P07550                     | CHEMBL210     | Family A G protein-coupled receptor | 0.0          | 0 / 21                |
| Beta-1 adrenergic receptor (by homology)       | ADRB1                   | P08588                     | CHEMBL213     | Family A G protein-coupled receptor | 0.0          | 0 / 8                 |
| Muscarinic acetylcholine receptor M5           | CHRM5                   | P08912                     | CHEMBL2035    | Family A G protein-coupled receptor | 0.0          | 1 / 0                 |

| Target                                   | Common name      | Uniprot ID       | ChEMBL ID     | Target Class                        | Probability* | Known actives (3D/2D) |
|------------------------------------------|------------------|------------------|---------------|-------------------------------------|--------------|-----------------------|
| Estrogen receptor beta                   | ESR2             | Q92731           | CHEMBL242     | Nuclear receptor                    | 0.0          | 24 / 66               |
| Interleukin-8 receptor B                 | CXCR2            | P25025           | CHEMBL2434    | Family A G protein-coupled receptor | 0.0          | 4 / 0                 |
| Pantothenate kinase 3                    | PANK3            | Q9H999           | CHEMBL3407328 | Enzyme                              | 0.0          | 1 / 0                 |
| Histamine H4 receptor                    | HRH4             | Q9H3N8           | CHEMBL3759    | Family A G protein-coupled receptor | 0.0          | 31 / 0                |
| GlutaminyI-peptide cyclotransferase      | QPCT             | Q16769           | CHEMBL4508    | Enzyme                              | 0.0          | 14 / 0                |
| L-lactate dehydrogenase A chain          | LDHA             | P00338           | CHEMBL4835    | Enzyme                              | 0.0          | 0 / 12                |
| L-lactate dehydrogenase B chain          | LDHB             | P07195           | CHEMBL4940    | Enzyme                              | 0.0          | 0 / 10                |
| C-C chemokine receptor type 2            | CCR2             | P41597           | CHEMBL4015    | Family A G protein-coupled receptor | 0.0          | 2 / 0                 |
| Aldehyde dehydrogenase 1A1 (by homology) | ALDH1A1          | P00352           | CHEMBL3577    | Enzyme                              | 0.0          | 1 / 0                 |
| Carbonic anhydrase VA                    | CA5A             | P35218           | CHEMBL4789    | Lyase                               | 0.0          | 8 / 0                 |
| Epoxide hydrolase 1                      | EPHX1            | P07099           | CHEMBL1968    | Protease                            | 0.0          | 10 / 0                |
| Cathepsin K                              | CTSK             | P43235           | CHEMBL268     | Protease                            | 0.0          | 11 / 0                |
| Cytochrome P450 26B1                     | CYP26B1          | Q9NR63           | CHEMBL3713687 | Cytochrome P450                     | 0.0          | 1 / 0                 |
| Cytochrome P450 26A1                     | CYP26A1          | O43174           | CHEMBL5141    | Cytochrome P450                     | 0.0          | 1 / 0                 |
| Alpha-1b adrenergic receptor             | ADRA1B           | P35368           | CHEMBL232     | Family A G protein-coupled receptor | 0.0          | 0 / 2                 |
| Estrogen receptor alpha                  | ESR1             | P03372           | CHEMBL206     | Nuclear receptor                    | 0.0          | 22 / 63               |
| Monoamine oxidase A                      | MAOA             | P21397           | CHEMBL1951    | Oxidoreductase                      | 0.0          | 7 / 2                 |
| GABA-B receptor                          | GABBR2<br>GABBR1 | O75899<br>Q9UBS5 | CHEMBL2111463 | Family C G protein-coupled receptor | 0.0          | 0 / 1                 |
| Serine/threonine-protein kinase PAK 1    | PAK1             | Q13153           | CHEMBL4600    | Kinase                              | 0.0          | 1 / 0                 |
| Serotonin transporter                    | SLC6A4           | P31645           | CHEMBL228     | Electrochemical transporter         | 0.0          | 4 / 6                 |
| Progesterone receptor                    | PGR              | P06401           | CHEMBL208     | Nuclear receptor                    | 0.0          | 25 / 0                |
| Fibroblast growth factor receptor 1      | FGFR1            | P11362           | CHEMBL3650    | Kinase                              | 0.0          | 6 / 0                 |
| G-protein coupled receptor 55            | GPR55            | Q9Y2T6           | CHEMBL1075322 | Family A G protein-coupled receptor | 0.0          | 0 / 1                 |
| N-arachidonyl glycine receptor           | GPR18            | Q14330           | CHEMBL2384898 | Family A G protein-coupled receptor | 0.0          | 0 / 1                 |

| Target                                     | Common name | Uniprot ID | ChEMBL ID  | Target Class | Probability* | Known actives (3D/2D) |
|--------------------------------------------|-------------|------------|------------|--------------|--------------|-----------------------|
| Ribonuclease H1                            | RNASEH1     | O60930     | CHEMBL5893 | Enzyme       | 0.0          | 0 / 1                 |
| Thrombin                                   | F2          | P00734     | CHEMBL204  | Protease     | 0.0          | 2 / 0                 |
| Catechol O-methyltransferase (by homology) | COMT        | P21964     | CHEMBL2023 | Transferase  | 0.0          | 0 / 2                 |
| Insulin-like growth factor I receptor      | IGF1R       | P08069     | CHEMBL1957 | Kinase       | 0.0          | 3 / 11                |
