# Supplementary material for: Water Extract from Inflorescences of Industrial Hemp Futura 75 Variety as a Source of Anti-Inflammatory, Anti-Proliferative and Antimycotic Agents: Results from In Silico, In Vitro and Ex Vivo Studies
Source: MDPI journal article supplement (doi:10.3390/antiox9050437), 2020-05-17
Supplement: s1 [file s1]

# SwissTargetPrediction

| Target                                                | Common name | Uniprot ID | ChEMBL ID     | Target Class     | Probability*    | Known actives (3D/2D) |
|-------------------------------------------------------|-------------|------------|---------------|------------------|-----------------|-----------------------|
| Carbonic anhydrase II                                 | CA2         | P00918     | CHEMBL205     | Lyase            | 1.0             | 18 / 61               |
| Carbonic anhydrase VII                                | CA7         | P43166     | CHEMBL2326    | Lyase            | 1.0             | 6 / 27                |
| Carbonic anhydrase I                                  | CA1         | P00915     | CHEMBL261     | Lyase            | 1.0             | 17 / 54               |
| Carbonic anhydrase III                                | CA3         | P07451     | CHEMBL2885    | Lyase            | 1.0             | 3 / 5                 |
| Carbonic anhydrase VI                                 | CA6         | P23280     | CHEMBL3025    | Lyase            | 1.0             | 5 / 6                 |
| Carbonic anhydrase XII                                | CA12        | O43570     | CHEMBL3242    | Lyase            | 1.0             | 12 / 32               |
| Carbonic anhydrase XIV                                | CA14        | Q9ULX7     | CHEMBL3510    | Lyase            | 1.0             | 7 / 27                |
| Carbonic anhydrase IX                                 | CA9         | Q16790     | CHEMBL3594    | Lyase            | 1.0             | 11 / 29               |
| Carbonic anhydrase IV                                 | CA4         | P22748     | CHEMBL3729    | Lyase            | 1.0             | 3 / 5                 |
| Carbonic anhydrase VB                                 | CA5B        | Q9Y2D0     | CHEMBL3969    | Lyase            | 1.0             | 4 / 3                 |
| Carbonic anhydrase VA                                 | CA5A        | P35218     | CHEMBL4789    | Lyase            | 1.0             | 3 / 4                 |
| Carbonic anhydrase XIII (by homology)                 | CA13        | Q8N1Q1     | CHEMBL3912    | Lyase            | 1.0             | 2 / 2                 |
| Alpha-(1,3)-fucosyltransferase 7                      | FUT7        | Q11130     | CHEMBL3596077 | Transferase      | 0.0849737018175 | 0 / 2                 |
| D-amino-acid oxidase                                  | DAO         | P14920     | CHEMBL5485    | Enzyme           | 0.033970689612  | 7 / 1                 |
| Steroid 5-alpha-reductase 2                           | SRD5A2      | P31213     | CHEMBL1856    | Oxidoreductase   | 0.033970689612  | 0 / 18                |
| Estrogen receptor beta                                | ESR2        | Q92731     | CHEMBL242     | Nuclear receptor | 0.0238327432783 | 1 / 13                |
| Squalene monooxygenase (by homology)                  | SQLE        | Q14534     | CHEMBL3592    | Enzyme           | 0.0238327432783 | 0 / 4                 |
| Aldo-keto reductase family 1 member C2                | AKR1C2      | P52895     | CHEMBL5847    | Enzyme           | 0.0238327432783 | 2 / 16                |
| Aldo-keto reductase family 1 member C1                | AKR1C1      | Q04828     | CHEMBL5905    | Enzyme           | 0.0238327432783 | 2 / 8                 |
| Serine/threonine-protein kinase/endoribonuclease IRE1 | ERN1        | O75460     | CHEMBL1163101 | Enzyme           | 0.0238327432783 | 0 / 36                |
| Histone deacetylase 6                                 | HDAC6       | Q9UBN7     | CHEMBL1865    | Eraser           | 0.0238327432783 | 1 / 0                 |
| Histone deacetylase 8                                 | HDAC8       | Q9BY41     | CHEMBL3192    | Eraser           | 0.0238327432783 | 1 / 0                 |
| L-lactate dehydrogenase A chain                       | LDHA        | P00338     | CHEMBL4835    | Enzyme           | 0.0238327432783 | 0 / 11                |
| L-lactate dehydrogenase B chain                       | LDHB        | P07195     | CHEMBL4940    | Enzyme           | 0.0238327432783 | 0 / 9                 |
| Estrogen receptor alpha                               | ESR1        | P03372     | CHEMBL206     | Nuclear receptor | 0.0             | 0 / 8                 |
| Transthyretin                                         | TTR         | P02766     | CHEMBL3194    | Secreted protein | 0.0             | 0 / 6                 |
| Catechol O-methyltransferase (by homology)            | COMT        | P21964     | CHEMBL2023    | Transferase      | 0.0             | 0 / 5                 |
| Leukocyte elastase                                    | ELANE       | P08246     | CHEMBL248     | Protease         | 0.0             | 0 / 8                 |

| Target                                                      | Common name | Uniprot ID | ChEMBL ID     | Target Class                        | Probability* | Known actives (3D/2D) |
|-------------------------------------------------------------|-------------|------------|---------------|-------------------------------------|--------------|-----------------------|
| Aldo-keto-reductase family 1 member C3                      | AKR1C3      | P42330     | CHEMBL4681    | Enzyme                              | 0.0          | 0 / 17                |
| Retinoic acid receptor gamma                                | RARG        | P13631     | CHEMBL2003    | Nuclear receptor                    | 0.0          | 0 / 7                 |
| Retinoic acid receptor beta                                 | RARB        | P10826     | CHEMBL2008    | Nuclear receptor                    | 0.0          | 0 / 8                 |
| Monoamine oxidase B                                         | MAOB        | P27338     | CHEMBL2039    | Oxidoreductase                      | 0.0          | 0 / 30                |
| Induced myeloid leukemia cell differentiation protein Mcl-1 | MCL1        | Q07820     | CHEMBL4361    | Other cytosolic protein             | 0.0          | 0 / 4                 |
| Insulin-like growth factor I receptor                       | IGF1R       | P08069     | CHEMBL1957    | Kinase                              | 0.0          | 0 / 2                 |
| ALK tyrosine kinase receptor                                | ALK         | Q9UM73     | CHEMBL4247    | Kinase                              | 0.0          | 0 / 2                 |
| Plasminogen activator inhibitor-1                           | SERPINE1    | P05121     | CHEMBL3475    | Secreted protein                    | 0.0          | 0 / 8                 |
| Apoptosis regulator Bcl-X                                   | BCL2L1      | Q07817     | CHEMBL4625    | Other ion channel                   | 0.0          | 0 / 2                 |
| Acetylcholinesterase                                        | ACHE        | P22303     | CHEMBL220     | Hydrolase                           | 0.0          | 0 / 3                 |
| G-protein coupled receptor 35                               | GPR35       | Q9HC97     | CHEMBL1293267 | Family A G protein-coupled receptor | 0.0          | 0 / 2                 |
| Thymidylate synthase                                        | TYMS        | P04818     | CHEMBL1952    | Transferase                         | 0.0          | 0 / 7                 |
| Serum albumin                                               | ALB         | P02768     | CHEMBL3253    | Secreted protein                    | 0.0          | 0 / 3                 |
| Succinate semialdehyde dehydrogenase                        | ALDH5A1     | P51649     | CHEMBL1911    | Oxidoreductase                      | 0.0          | 0 / 1                 |
| Tyrosinase (by homology)                                    | TYR         | P14679     | CHEMBL1973    | Oxidoreductase                      | 0.0          | 0 / 3                 |
| Gamma-amino-N-butyrate transaminase                         | ABAT        | P80404     | CHEMBL2044    | Transferase                         | 0.0          | 0 / 2                 |
| Phospholipase A2 group 1VB                                  | PLA2G4B     | P0C869     | CHEMBL4136    | Enzyme                              | 0.0          | 0 / 7                 |
| Dipeptidyl peptidase IV                                     | DPP4        | P27487     | CHEMBL284     | Protease                            | 0.0          | 1 / 1                 |
| Receptor-type tyrosine-protein phosphatase beta             | PTPRB       | P23467     | CHEMBL2706    | Phosphatase                         | 0.0          | 2 / 0                 |
| DNA polymerase beta                                         | POLB        | P06746     | CHEMBL2392    | Enzyme                              | 0.0          | 0 / 2                 |
| Poly [ADP-ribose] polymerase-1                              | PARP1       | P09874     | CHEMBL3105    | Enzyme                              | 0.0          | 0 / 4                 |
| Matrix metalloproteinase 9                                  | MMP9        | P14780     | CHEMBL321     | Protease                            | 0.0          | 2 / 0                 |
| Matrix metalloproteinase 1                                  | MMP1        | P03956     | CHEMBL332     | Protease                            | 0.0          | 2 / 0                 |
| Matrix metalloproteinase 2                                  | MMP2        | P08253     | CHEMBL333     | Protease                            | 0.0          | 2 / 0                 |
| Matrix metalloproteinase 8                                  | MMP8        | P22894     | CHEMBL4588    | Protease                            | 0.0          | 1 / 0                 |
| Serotonin 3a (5-HT3a) receptor                              | HTR3A       | P46098     | CHEMBL1899    | Ligand-gated ion channel            | 0.0          | 0 / 1                 |
| Toll-like receptor 4                                        | TLR4        | O00206     | CHEMBL5255    | Toll-like and Il-1                  | 0.0          | 1 / 0                 |

| Target                                                        | Common name | Uniprot ID | ChEMBL ID     | Target Class                        | Probability* | Known actives (3D/2D) |
|---------------------------------------------------------------|-------------|------------|---------------|-------------------------------------|--------------|-----------------------|
| (by homology)                                                 |             |            |               | receptors                           |              |                       |
| Estradiol 17-beta-dehydrogenase 1                             | HSD17B1     | P14061     | CHEMBL3181    | Enzyme                              | 0.0          | 0 / 5                 |
| Peptidyl-prolyl cis-trans isomerase NIMA-interacting 1        | PIN1        | Q13526     | CHEMBL2288    | Enzyme                              | 0.0          | 2 / 0                 |
| Cyclooxygenase-1                                              | PTGS1       | P23219     | CHEMBL221     | Oxidoreductase                      | 0.0          | 0 / 4                 |
| Cyclooxygenase-2                                              | PTGS2       | P35354     | CHEMBL230     | Oxidoreductase                      | 0.0          | 0 / 5                 |
| Tyrosine-protein kinase FYN                                   | FYN         | P06241     | CHEMBL1841    | Kinase                              | 0.0          | 0 / 1                 |
| Tyrosine-protein kinase LCK                                   | LCK         | P06239     | CHEMBL258     | Kinase                              | 0.0          | 0 / 2                 |
| Retinoic acid receptor alpha                                  | RARA        | P10276     | CHEMBL2055    | Nuclear receptor                    | 0.0          | 0 / 4                 |
| Fatty acid binding protein adipocyte                          | FABP4       | P15090     | CHEMBL2083    | Fatty acid binding protein family   | 0.0          | 0 / 1                 |
| Fatty acid binding protein muscle                             | FABP3       | P05413     | CHEMBL3344    | Fatty acid binding protein family   | 0.0          | 0 / 1                 |
| Carboxylesterase 2                                            | CES2        | O00748     | CHEMBL3180    | Enzyme                              | 0.0          | 0 / 5                 |
| Leucine aminopeptidase                                        | LAP3        | P28838     | CHEMBL3965    | Protease                            | 0.0          | 1 / 0                 |
| Hydroxycarboxylic acid receptor 2                             | HCAR2       | Q8TDS4     | CHEMBL3785    | Family A G protein-coupled receptor | 0.0          | 2 / 0                 |
| AICAR transformylase                                          | ATIC        | P31939     | CHEMBL2518    | Enzyme                              | 0.0          | 0 / 1                 |
| Arachidonate 12-lipoxygenase                                  | ALOX12      | P18054     | CHEMBL3687    | Enzyme                              | 0.0          | 0 / 1                 |
| Fructose-1,6-bisphosphatase                                   | FBP1        | P09467     | CHEMBL3975    | Enzyme                              | 0.0          | 4 / 0                 |
| Leukocyte common antigen                                      | PTPRC       | P08575     | CHEMBL3243    | Enzyme                              | 0.0          | 0 / 4                 |
| Cytosolic phospholipase A2                                    | PLA2G4A     | P47712     | CHEMBL3816    | Enzyme                              | 0.0          | 0 / 1                 |
| Kynurenine 3-monooxygenase (by homology)                      | KMO         | O15229     | CHEMBL2145    | Oxidoreductase                      | 0.0          | 3 / 0                 |
| C-terminal-binding protein 2                                  | CTBP2       | P56545     | CHEMBL3797016 | Unclassified protein                | 0.0          | 2 / 0                 |
| Epidermal growth factor receptor erbB1                        | EGFR        | P00533     | CHEMBL203     | Kinase                              | 0.0          | 0 / 1                 |
| Serine/threonine-protein kinase Aurora-B                      | AURKB       | Q96GD4     | CHEMBL2185    | Kinase                              | 0.0          | 0 / 1                 |
| Dual-specificity tyrosine-phosphorylation regulated kinase 1A | DYRK1A      | Q13627     | CHEMBL2292    | Kinase                              | 0.0          | 0 / 1                 |
| Peroxisome proliferator-activated receptor gamma              | PPARG       | P37231     | CHEMBL235     | Nuclear receptor                    | 0.0          | 0 / 1                 |

| Target                                                        | Common name | Uniprot ID | ChEMBL ID     | Target Class                        | Probability* | Known actives (3D/2D) |
|---------------------------------------------------------------|-------------|------------|---------------|-------------------------------------|--------------|-----------------------|
| Tyrosine-protein kinase SRC                                   | SRC         | P12931     | CHEMBL267     | Kinase                              | 0.0          | 0 / 1                 |
| Focal adhesion kinase 1                                       | PTK2        | Q05397     | CHEMBL2695    | Kinase                              | 0.0          | 0 / 1                 |
| Vascular endothelial growth factor receptor 2                 | KDR         | P35968     | CHEMBL279     | Kinase                              | 0.0          | 0 / 1                 |
| Hepatocyte growth factor receptor                             | MET         | P08581     | CHEMBL3717    | Kinase                              | 0.0          | 0 / 1                 |
| Serine/threonine-protein kinase NEK2                          | NEK2        | P51955     | CHEMBL3835    | Kinase                              | 0.0          | 0 / 1                 |
| Dual specificity protein kinase CLK1                          | CLK1        | P49759     | CHEMBL4224    | Kinase                              | 0.0          | 0 / 1                 |
| Tyrosine-protein kinase receptor UFO                          | AXL         | P30530     | CHEMBL4895    | Kinase                              | 0.0          | 0 / 1                 |
| Dual specificity tyrosine-phosphorylation-regulated kinase 1B | DYRK1B      | Q9Y463     | CHEMBL5543    | Kinase                              | 0.0          | 0 / 1                 |
| Monoamine oxidase A                                           | MAOA        | P21397     | CHEMBL1951    | Oxidoreductase                      | 0.0          | 0 / 4                 |
| Cannabinoid receptor 2                                        | CNR2        | P34972     | CHEMBL253     | Family A G protein-coupled receptor | 0.0          | 0 / 3                 |
| Cannabinoid receptor 1                                        | CNR1        | P21554     | CHEMBL218     | Family A G protein-coupled receptor | 0.0          | 0 / 2                 |
| Glycogen synthase kinase-3 beta                               | GSK3B       | P49841     | CHEMBL262     | Kinase                              | 0.0          | 0 / 1                 |
| Estradiol 17-beta-dehydrogenase 3                             | HSD17B3     | P37058     | CHEMBL4234    | Enzyme                              | 0.0          | 0 / 5                 |
| Neuromedin-U receptor 2                                       | NMUR2       | Q9GZQ4     | CHEMBL1075144 | Family A G protein-coupled receptor | 0.0          | 0 / 1                 |
| Group IID secretory phospholipase A2                          | PLA2G2D     | Q9UNK4     | CHEMBL4281    | Enzyme                              | 0.0          | 0 / 1                 |
| Norepinephrine transporter                                    | SLC6A2      | P23975     | CHEMBL222     | Electrochemical transporter         | 0.0          | 0 / 2                 |
| Aminopeptidase A                                              | ENPEP       | Q07075     | CHEMBL3439    | Protease                            | 0.0          | 1 / 0                 |
| Lysine-specific demethylase 4D-like                           | KDM4E       | B2RXH2     | CHEMBL1293226 | Eraser                              | 0.0          | 2 / 3                 |
| Lysine-specific demethylase 4A                                | KDM4A       | O75164     | CHEMBL5896    | Eraser                              | 0.0          | 2 / 2                 |
| Metabotropic glutamate receptor 2 (by homology)               | GRM2        | Q14416     | CHEMBL5137    | Family C G protein-coupled receptor | 0.0          | 0 / 3                 |
| Melatonin receptor 1A                                         | MTNR1A      | P48039     | CHEMBL1945    | Family A G protein-coupled receptor | 0.0          | 0 / 1                 |
| Fatty acid synthase                                           | FASN        | P49327     | CHEMBL4158    | Transferase                         | 0.0          | 0 / 1                 |
