# Supplementary material for: Water Extract from Inflorescences of Industrial Hemp Futura 75 Variety as a Source of Anti-Inflammatory, Anti-Proliferative and Antimycotic Agents: Results from In Silico, In Vitro and Ex Vivo Studies
Source: MDPI journal article supplement (doi:10.3390/antiox9050437), 2020-05-17
Supplement: s1 [file s1]

# SwissTargetPrediction

| Target                                                | Common name | Uniprot ID | ChEMBL ID     | Target Class                      | Probability*    | Known actives (3D/2D) |
|-------------------------------------------------------|-------------|------------|---------------|-----------------------------------|-----------------|-----------------------|
| D-amino-acid oxidase                                  | DAO         | P14920     | CHEMBL5485    | Enzyme                            | 0.248387034018  | 0 / 1                 |
| Carbonic anhydrase II                                 | CA2         | P00918     | CHEMBL205     | Lyase                             | 0.0544879468076 | 0 / 52                |
| Carbonic anhydrase VII                                | CA7         | P43166     | CHEMBL2326    | Lyase                             | 0.0544879468076 | 0 / 28                |
| Carbonic anhydrase I                                  | CA1         | P00915     | CHEMBL261     | Lyase                             | 0.0544879468076 | 0 / 51                |
| Carbonic anhydrase III                                | CA3         | P07451     | CHEMBL2885    | Lyase                             | 0.0544879468076 | 0 / 4                 |
| Carbonic anhydrase VI                                 | CA6         | P23280     | CHEMBL3025    | Lyase                             | 0.0544879468076 | 0 / 7                 |
| Carbonic anhydrase XII                                | CA12        | O43570     | CHEMBL3242    | Lyase                             | 0.0544879468076 | 0 / 34                |
| Carbonic anhydrase XIV                                | CA14        | Q9ULX7     | CHEMBL3510    | Lyase                             | 0.0544879468076 | 0 / 28                |
| Carbonic anhydrase IX                                 | CA9         | Q16790     | CHEMBL3594    | Lyase                             | 0.0544879468076 | 0 / 32                |
| Carbonic anhydrase IV                                 | CA4         | P22748     | CHEMBL3729    | Lyase                             | 0.0544879468076 | 0 / 5                 |
| Carbonic anhydrase XIII (by homology)                 | CA13        | Q8N1Q1     | CHEMBL3912    | Lyase                             | 0.0544879468076 | 0 / 3                 |
| Carbonic anhydrase VB                                 | CA5B        | Q9Y2D0     | CHEMBL3969    | Lyase                             | 0.0544879468076 | 0 / 4                 |
| Carbonic anhydrase VA                                 | CA5A        | P35218     | CHEMBL4789    | Lyase                             | 0.0544879468076 | 0 / 5                 |
| Steroid 5-alpha-reductase 2                           | SRD5A2      | P31213     | CHEMBL1856    | Oxidoreductase                    | 0.0238327432783 | 0 / 19                |
| Glutamate carboxypeptidase II                         | FOLH1       | Q04609     | CHEMBL1892    | Protease                          | 0.0238327432783 | 0 / 4                 |
| Thymidylate synthase                                  | TYMS        | P04818     | CHEMBL1952    | Transferase                       | 0.0             | 0 / 4                 |
| Fatty acid binding protein adipocyte                  | FABP4       | P15090     | CHEMBL2083    | Fatty acid binding protein family | 0.0             | 0 / 1                 |
| Fatty acid binding protein muscle                     | FABP3       | P05413     | CHEMBL3344    | Fatty acid binding protein family | 0.0             | 0 / 1                 |
| Alpha-(1,3)-fucosyltransferase 7                      | FUT7        | Q11130     | CHEMBL3596077 | Transferase                       | 0.0             | 0 / 2                 |
| Estrogen receptor beta                                | ESR2        | Q92731     | CHEMBL242     | Nuclear receptor                  | 0.0             | 0 / 3                 |
| Thiopurine S-methyltransferase                        | TPMT        | P51580     | CHEMBL2500    | Enzyme                            | 0.0             | 0 / 1                 |
| Serine/threonine-protein kinase/endoribonuclease IRE1 | ERN1        | O75460     | CHEMBL1163101 | Enzyme                            | 0.0             | 0 / 11                |
| Group IID secretory phospholipase A2                  | PLA2G2D     | Q9UNK4     | CHEMBL4281    | Enzyme                            | 0.0             | 0 / 1                 |
| Aldo-keto-reductase family 1 member C3                | AKR1C3      | P42330     | CHEMBL4681    | Enzyme                            | 0.0             | 0 / 25                |
| L-lactate dehydrogenase A chain                       | LDHA        | P00338     | CHEMBL4835    | Enzyme                            | 0.0             | 0 / 3                 |
| L-lactate dehydrogenase B chain                       | LDHB        | P07195     | CHEMBL4940    | Enzyme                            | 0.0             | 0 / 3                 |
| Aldo-keto reductase family 1 member C2                | AKR1C2      | P52895     | CHEMBL5847    | Enzyme                            | 0.0             | 0 / 9                 |
| Indoleamine 2,3-                                      | IDO1        | P14902     | CHEMBL4685    | Enzyme                            | 0.0             | 0 / 2                 |

| Target                                                      | Common name | Uniprot ID | ChEMBL ID     | Target Class                        | Probability* | Known actives (3D/2D) |
|-------------------------------------------------------------|-------------|------------|---------------|-------------------------------------|--------------|-----------------------|
| dioxygenase                                                 |             |            |               |                                     |              |                       |
| WD repeat-containing protein 5                              | WDR5        | P61964     | CHEMBL1075317 | Unclassified protein                | 0.0          | 0 / 1                 |
| Acyl coenzyme A:cholesterol acyltransferase                 | CES1        | P23141     | CHEMBL2265    | Enzyme                              | 0.0          | 0 / 4                 |
| Carboxylesterase 2                                          | CES2        | O00748     | CHEMBL3180    | Enzyme                              | 0.0          | 0 / 3                 |
| Poly [ADP-ribose] polymerase-1                              | PARP1       | P09874     | CHEMBL3105    | Enzyme                              | 0.0          | 0 / 2                 |
| Retinoic acid receptor gamma                                | RARG        | P13631     | CHEMBL2003    | Nuclear receptor                    | 0.0          | 0 / 3                 |
| Retinoic acid receptor beta                                 | RARB        | P10826     | CHEMBL2008    | Nuclear receptor                    | 0.0          | 0 / 5                 |
| Serotonin transporter                                       | SLC6A4      | P31645     | CHEMBL228     | Electrochemical transporter         | 0.0          | 0 / 1                 |
| Dopamine transporter                                        | SLC6A3      | Q01959     | CHEMBL238     | Electrochemical transporter         | 0.0          | 0 / 2                 |
| Aldo-keto reductase family 1 member C1                      | AKR1C1      | Q04828     | CHEMBL5905    | Enzyme                              | 0.0          | 0 / 2                 |
| Acetylcholinesterase                                        | ACHE        | P22303     | CHEMBL220     | Hydrolase                           | 0.0          | 0 / 7                 |
| Apoptosis regulator Bcl-X                                   | BCL2L1      | Q07817     | CHEMBL4625    | Other ion channel                   | 0.0          | 0 / 2                 |
| Squalene monooxygenase (by homology)                        | SQLE        | Q14534     | CHEMBL3592    | Enzyme                              | 0.0          | 0 / 1                 |
| Cystine/glutamate transporter                               | SLC7A11     | Q9UPY5     | CHEMBL1075149 | Electrochemical transporter         | 0.0          | 0 / 1                 |
| Plectin                                                     | PLEC        | Q15149     | CHEMBL1293240 | Unclassified protein                | 0.0          | 0 / 1                 |
| G-protein coupled receptor 35                               | GPR35       | Q9HC97     | CHEMBL1293267 | Family A G protein-coupled receptor | 0.0          | 0 / 2                 |
| Retinoic acid receptor alpha                                | RARA        | P10276     | CHEMBL2055    | Nuclear receptor                    | 0.0          | 0 / 2                 |
| Protein kinase C delta                                      | PRKCD       | Q05655     | CHEMBL2996    | Kinase                              | 0.0          | 0 / 3                 |
| Protein kinase C alpha                                      | PRKCA       | P17252     | CHEMBL299     | Kinase                              | 0.0          | 0 / 3                 |
| Serum albumin                                               | ALB         | P02768     | CHEMBL3253    | Secreted protein                    | 0.0          | 0 / 1                 |
| Induced myeloid leukemia cell differentiation protein Mcl-1 | MCL1        | Q07820     | CHEMBL4361    | Other cytosolic protein             | 0.0          | 0 / 1                 |
| Aminopeptidase N                                            | ANPEP       | P15144     | CHEMBL1907    | Protease                            | 0.0          | 0 / 3                 |
| Dihydroorotate dehydrogenase                                | DHODH       | Q02127     | CHEMBL1966    | Oxidoreductase                      | 0.0          | 0 / 3                 |
| Estrogen receptor alpha                                     | ESR1        | P03372     | CHEMBL206     | Nuclear receptor                    | 0.0          | 0 / 1                 |
| Dipeptidyl peptidase IV                                     | DPP4        | P27487     | CHEMBL284     | Protease                            | 0.0          | 0 / 1                 |
| Transthyretin                                               | TTR         | P02766     | CHEMBL3194    | Secreted protein                    | 0.0          | 0 / 2                 |
| Aminopeptidase A                                            | ENPEP       | Q07075     | CHEMBL3439    | Protease                            | 0.0          | 0 / 3                 |
| Urokinase-type plasminogen activator                        | PLAU        | P00749     | CHEMBL3286    | Protease                            | 0.0          | 0 / 1                 |

| Target                                                         | Common name | Uniprot ID | ChEMBL ID     | Target Class     | Probability* | Known actives (3D/2D) |
|----------------------------------------------------------------|-------------|------------|---------------|------------------|--------------|-----------------------|
| PH domain leucine-rich repeat-containing protein phosphatase 2 | PHLPP2      | Q6ZVD8     | CHEMBL1275209 | Enzyme           | 0.0          | 0 / 1                 |
| DNA polymerase beta                                            | POLB        | P06746     | CHEMBL2392    | Enzyme           | 0.0          | 0 / 1                 |
| Tyrosinase                                                     | TYR         | P14679     | CHEMBL1973    | Oxidoreductase   | 0.0          | 0 / 1                 |
| Glycogen synthase kinase-3 beta                                | GSK3B       | P49841     | CHEMBL262     | Kinase           | 0.0          | 0 / 2                 |
| Cyclooxygenase-1                                               | PTGS1       | P23219     | CHEMBL221     | Oxidoreductase   | 0.0          | 0 / 1                 |
| Cyclooxygenase-2                                               | PTGS2       | P35354     | CHEMBL230     | Oxidoreductase   | 0.0          | 0 / 1                 |
| Protein-tyrosine phosphatase 1B                                | PTPN1       | P18031     | CHEMBL335     | Phosphatase      | 0.0          | 0 / 2                 |
| LDL-associated phospholipase A2                                | PLA2G7      | Q13093     | CHEMBL3514    | Enzyme           | 0.0          | 0 / 1                 |
| Monoamine oxidase B                                            | MAOB        | P27338     | CHEMBL2039    | Oxidoreductase   | 0.0          | 0 / 2                 |
| Catechol O-methyltransferase (by homology)                     | COMT        | P21964     | CHEMBL2023    | Transferase      | 0.0          | 0 / 1                 |
| Histone deacetylase 3                                          | HDAC3       | O15379     | CHEMBL1829    | Eraser           | 0.0          | 0 / 1                 |
| Histone deacetylase 6                                          | HDAC6       | Q9UBN7     | CHEMBL1865    | Eraser           | 0.0          | 0 / 1                 |
| Histone deacetylase 2                                          | HDAC2       | Q92769     | CHEMBL1937    | Eraser           | 0.0          | 0 / 1                 |
| Histone deacetylase 8                                          | HDAC8       | Q9BY41     | CHEMBL3192    | Eraser           | 0.0          | 0 / 1                 |
| Histone deacetylase 1                                          | HDAC1       | Q13547     | CHEMBL325     | Eraser           | 0.0          | 0 / 1                 |
| Retinoid X receptor beta                                       | RXRB        | P28702     | CHEMBL1870    | Nuclear receptor | 0.0          | 0 / 3                 |
| Retinoid X receptor gamma                                      | RXRG        | P48443     | CHEMBL2004    | Nuclear receptor | 0.0          | 0 / 1                 |
| Retinoid X receptor alpha                                      | RXRA        | P19793     | CHEMBL2061    | Nuclear receptor | 0.0          | 0 / 3                 |
| Leukocyte elastase                                             | ELANE       | P08246     | CHEMBL248     | Protease         | 0.0          | 0 / 1                 |
