# Supplementary material for: Water Extract from Inflorescences of Industrial Hemp Futura 75 Variety as a Source of Anti-Inflammatory, Anti-Proliferative and Antimycotic Agents: Results from In Silico, In Vitro and Ex Vivo Studies
Source: MDPI journal article supplement (doi:10.3390/antiox9050437), 2020-05-17
Supplement: s1 [file s1]

# SwissTargetPrediction

| Target                                    | Common name             | Uniprot ID                 | ChEMBL ID     | Target Class                        | Probability*    | Known actives (3D/2D) |
|-------------------------------------------|-------------------------|----------------------------|---------------|-------------------------------------|-----------------|-----------------------|
| Neuromedin-U receptor 2                   | NMUR2                   | Q9GZQ4                     | CHEMBL1075144 | Family A G protein-coupled receptor | 1.0             | 1 / 1                 |
| Alpha-2a adrenergic receptor              | ADRA2A                  | P08913                     | CHEMBL1867    | Family A G protein-coupled receptor | 1.0             | 1 / 1                 |
| Adrenergic receptor alpha-2               | ADRA2C                  | P18825                     | CHEMBL1916    | Family A G protein-coupled receptor | 1.0             | 2 / 2                 |
| Acetylcholinesterase                      | ACHE                    | P22303                     | CHEMBL220     | Hydrolase                           | 1.0             | 2 / 20                |
| Aldose reductase                          | AKR1B1                  | P15121                     | CHEMBL1900    | Enzyme                              | 0.612554147766  | 10 / 65               |
| Carbonic anhydrase VII                    | CA7                     | P43166                     | CHEMBL2326    | Lyase                               | 0.487243937943  | 4 / 13                |
| Carbonic anhydrase XII                    | CA12                    | O43570                     | CHEMBL3242    | Lyase                               | 0.487243937943  | 4 / 20                |
| Carbonic anhydrase IV                     | CA4                     | P22748                     | CHEMBL3729    | Lyase                               | 0.487243937943  | 4 / 10                |
| NADPH oxidase 4                           | NOX4                    | Q9NPH5                     | CHEMBL1250375 | Enzyme                              | 0.392056274442  | 1 / 6                 |
| Carbonic anhydrase II                     | CA2                     | P00918                     | CHEMBL205     | Lyase                               | 0.343847677983  | 3 / 10                |
| Ribosomal protein S6 kinase alpha 3       | RPS6KA3                 | P51812                     | CHEMBL2345    | Kinase                              | 0.200260701867  | 7 / 19                |
| Quinone reductase 2                       | NQO2                    | P16083                     | CHEMBL3959    | Enzyme                              | 0.200260701867  | 1 / 1                 |
| Xanthine dehydrogenase                    | XDH                     | P47989                     | CHEMBL1929    | Oxidoreductase                      | 0.114004552328  | 2 / 16                |
| Lymphocyte differentiation antigen CD38   | CD38                    | P28907                     | CHEMBL4660    | Enzyme                              | 0.0948793379634 | 0 / 2                 |
| Cyclooxygenase-2                          | PTGS2                   | P35354                     | CHEMBL230     | Oxidoreductase                      | 0.0948793379634 | 1 / 4                 |
| Phosphodiesterase 5A                      | PDE5A                   | O76074                     | CHEMBL1827    | Phosphodiesterase                   | 0.0661303830337 | 1 / 6                 |
| TNF-alpha                                 | TNF                     | P01375                     | CHEMBL1825    | Secreted protein                    | 0.0661303830337 | 0 / 3                 |
| Interleukin-2                             | IL2                     | P60568                     | CHEMBL5880    | Secreted protein                    | 0.0661303830337 | 0 / 4                 |
| Adenosine A1 receptor (by homology)       | ADORA1                  | P30542                     | CHEMBL226     | Family A G protein-coupled receptor | 0.0661303830337 | 0 / 13                |
| Arachidonate 5-lipoxygenase               | ALOX5                   | P09917                     | CHEMBL215     | Oxidoreductase                      | 0.0661303830337 | 0 / 45                |
| Telomerase reverse transcriptase          | TERT                    | O14746                     | CHEMBL2916    | Enzyme                              | 0.0661303830337 | 0 / 6                 |
| Transitional endoplasmic reticulum ATPase | VCP                     | P55072                     | CHEMBL1075145 | Primary active transporter          | 0.0             | 1 / 0                 |
| Troponin, cardiac muscle                  | TNNC1<br>TNNT2<br>TNNI3 | P63316<br>P45379<br>P19429 | CHEMBL2095202 | Unclassified protein                | 0.0             | 1 / 0                 |
| Adenosine A3 receptor                     | ADORA3                  | P0DMS8                     | CHEMBL256     | Family A G protein-coupled receptor | 0.0             | 0 / 13                |
| Squalene monooxygenase (by homology)      | SQLE                    | Q14534                     | CHEMBL3592    | Enzyme                              | 0.0             | 2 / 0                 |
| Equilibrative                             | SLC29A1                 | Q99808                     | CHEMBL1997    | Electrochemical                     | 0.0             | 2 / 0                 |

| Target                                                      | Common name | Uniprot ID | ChEMBL ID     | Target Class                        | Probability* | Known actives (3D/2D) |
|-------------------------------------------------------------|-------------|------------|---------------|-------------------------------------|--------------|-----------------------|
| nucleoside transporter 1                                    |             |            |               | transporter                         |              |                       |
| Plasminogen                                                 | PLG         | P00747     | CHEMBL1801    | Protease                            | 0.0          | 0 / 2                 |
| Tumour suppressor p53/oncoprotein Mdm2                      | TP53        | P04637     | CHEMBL4096    | Transcription factor                | 0.0          | 1 / 0                 |
| ATP-binding cassette sub-family G member 2                  | ABCG2       | Q9UNQ0     | CHEMBL5393    | Primary active transporter          | 0.0          | 0 / 37                |
| Cytochrome P450 1B1                                         | CYP1B1      | Q16678     | CHEMBL4878    | Cytochrome P450                     | 0.0          | 0 / 32                |
| Voltage-gated potassium channel subunit Kv1.3               | KCNA3       | P22001     | CHEMBL4633    | Voltage-gated ion channel           | 0.0          | 0 / 2                 |
| Tyrosyl-DNA phosphodiesterase 1                             | TDP1        | Q9NUW8     | CHEMBL1075138 | Enzyme                              | 0.0          | 1 / 0                 |
| Tyrosine-protein kinase SRC                                 | SRC         | P12931     | CHEMBL267     | Kinase                              | 0.0          | 0 / 9                 |
| Protein kinase C gamma                                      | PRKCG       | P05129     | CHEMBL2938    | Kinase                              | 0.0          | 9 / 0                 |
| Protein kinase C delta                                      | PRKCD       | Q05655     | CHEMBL2996    | Kinase                              | 0.0          | 12 / 0                |
| Protein kinase C alpha                                      | PRKCA       | P17252     | CHEMBL299     | Kinase                              | 0.0          | 12 / 0                |
| Protein kinase C beta                                       | PRKCB       | P05771     | CHEMBL3045    | Kinase                              | 0.0          | 13 / 0                |
| Protein kinase C epsilon                                    | PRKCE       | Q02156     | CHEMBL3582    | Kinase                              | 0.0          | 12 / 0                |
| Protein kinase C eta                                        | PRKCH       | P24723     | CHEMBL3616    | Kinase                              | 0.0          | 12 / 0                |
| cAMP-dependent protein kinase alpha-catalytic subunit       | PRKACA      | P17612     | CHEMBL4101    | Kinase                              | 0.0          | 4 / 0                 |
| Protein kinase C (PKC)                                      | PRKCZ       | Q05513     | CHEMBL3438    | Kinase                              | 0.0          | 4 / 0                 |
| Plasminogen activator inhibitor-1                           | SERPINE1    | P05121     | CHEMBL3475    | Secreted protein                    | 0.0          | 2 / 0                 |
| Beta amyloid A4 protein                                     | APP         | P05067     | CHEMBL2487    | Membrane receptor                   | 0.0          | 0 / 2                 |
| Thrombin and coagulation factor X                           | F10         | P00742     | CHEMBL244     | Protease                            | 0.0          | 2 / 0                 |
| Estrogen receptor alpha                                     | ESR1        | P03372     | CHEMBL206     | Nuclear receptor                    | 0.0          | 1 / 0                 |
| Beta-1 adrenergic receptor                                  | ADRB1       | P08588     | CHEMBL213     | Family A G protein-coupled receptor | 0.0          | 2 / 0                 |
| Metastin receptor                                           | KISS1R      | Q969F8     | CHEMBL5413    | Family A G protein-coupled receptor | 0.0          | 1 / 0                 |
| Induced myeloid leukemia cell differentiation protein Mcl-1 | MCL1        | Q07820     | CHEMBL4361    | Other cytosolic protein             | 0.0          | 0 / 1                 |
| Aldehyde dehydrogenase                                      | ALDH2       | P05091     | CHEMBL1935    | Oxidoreductase                      | 0.0          | 0 / 2                 |

| Target                                   | Common name | Uniprot ID | ChEMBL ID     | Target Class                        | Probability* | Known actives (3D/2D) |
|------------------------------------------|-------------|------------|---------------|-------------------------------------|--------------|-----------------------|
| Dynamin-2                                | DNM2        | P50570     | CHEMBL5812    | Enzyme                              | 0.0          | 1 / 0                 |
| Serine/threonine-protein kinase Chk2     | CHEK2       | O96017     | CHEMBL2527    | Kinase                              | 0.0          | 1 / 0                 |
| Serine/threonine-protein kinase Chk1     | CHEK1       | O14757     | CHEMBL4630    | Kinase                              | 0.0          | 1 / 0                 |
| Carbonic anhydrase I                     | CA1         | P00915     | CHEMBL261     | Lyase                               | 0.0          | 0 / 7                 |
| Carbonic anhydrase IX                    | CA9         | Q16790     | CHEMBL3594    | Lyase                               | 0.0          | 0 / 10                |
| Carbonic anhydrase XIII                  | CA13        | Q8N1Q1     | CHEMBL3912    | Lyase                               | 0.0          | 0 / 3                 |
| Epidermal growth factor receptor erbB1   | EGFR        | P00533     | CHEMBL203     | Kinase                              | 0.0          | 0 / 11                |
| Adenosine A2a receptor (by homology)     | ADORA2A     | P29274     | CHEMBL251     | Family A G protein-coupled receptor | 0.0          | 0 / 5                 |
| Microtubule-associated protein tau       | MAPT        | P10636     | CHEMBL1293224 | Unclassified protein                | 0.0          | 0 / 1                 |
| Lysine-specific demethylase 4D-like      | KDM4E       | B2RXH2     | CHEMBL1293226 | Eraser                              | 0.0          | 0 / 1                 |
| G-protein coupled receptor 35            | GPR35       | Q9HC97     | CHEMBL1293267 | Family A G protein-coupled receptor | 0.0          | 0 / 2                 |
| Vasopressin V2 receptor                  | AVPR2       | P30518     | CHEMBL1790    | Family A G protein-coupled receptor | 0.0          | 0 / 1                 |
| DNA topoisomerase II alpha               | TOP2A       | P11388     | CHEMBL1806    | Isomerase                           | 0.0          | 0 / 1                 |
| Monoamine oxidase A                      | MAOA        | P21397     | CHEMBL1951    | Oxidoreductase                      | 0.0          | 0 / 2                 |
| Insulin-like growth factor I receptor    | IGF1R       | P08069     | CHEMBL1957    | Kinase                              | 0.0          | 0 / 1                 |
| Tyrosine-protein kinase receptor FLT3    | FLT3        | P36888     | CHEMBL1974    | Kinase                              | 0.0          | 0 / 5                 |
| Cytochrome P450 19A1                     | CYP19A1     | P11511     | CHEMBL1978    | Cytochrome P450                     | 0.0          | 0 / 2                 |
| Insulin receptor                         | INSR        | P06213     | CHEMBL1981    | Kinase                              | 0.0          | 0 / 1                 |
| Thrombin                                 | F2          | P00734     | CHEMBL204     | Protease                            | 0.0          | 0 / 2                 |
| Serine/threonine-protein kinase PIM1     | PIM1        | P11309     | CHEMBL2147    | Kinase                              | 0.0          | 0 / 3                 |
| Serine/threonine-protein kinase Aurora-B | AURKB       | Q96GD4     | CHEMBL2185    | Kinase                              | 0.0          | 0 / 1                 |
| Dopamine D4 receptor                     | DRD4        | P21917     | CHEMBL219     | Family A G protein-coupled receptor | 0.0          | 0 / 1                 |
| Glyoxalase I                             | GLO1        | Q04760     | CHEMBL2424    | Enzyme                              | 0.0          | 0 / 4                 |
| Myosin light chain kinase, smooth muscle | MYLK        | Q15746     | CHEMBL2428    | Kinase                              | 0.0          | 0 / 1                 |
| Myeloperoxidase                          | MPO         | P05164     | CHEMBL2439    | Enzyme                              | 0.0          | 0 / 1                 |
| PI3-kinase p85-alpha subunit             | PIK3R1      | P27986     | CHEMBL2506    | Enzyme                              | 0.0          | 0 / 1                 |
| Death-associated                         | DAPK1       | P53355     | CHEMBL2558    | Kinase                              | 0.0          | 0 / 2                 |

| Target                                        | Common name | Uniprot ID | ChEMBL ID  | Target Class                        | Probability* | Known actives (3D/2D) |
|-----------------------------------------------|-------------|------------|------------|-------------------------------------|--------------|-----------------------|
| protein kinase 1                              |             |            |            |                                     |              |                       |
| Liver glycogen phosphorylase                  | PYGL        | P06737     | CHEMBL2568 | Enzyme                              | 0.0          | 0 / 1                 |
| Tyrosine-protein kinase SYK                   | SYK         | P43405     | CHEMBL2599 | Kinase                              | 0.0          | 0 / 2                 |
| Glycogen synthase kinase-3 beta               | GSK3B       | P49841     | CHEMBL262  | Kinase                              | 0.0          | 0 / 2                 |
| Focal adhesion kinase 1                       | PTK2        | Q05397     | CHEMBL2695 | Kinase                              | 0.0          | 0 / 1                 |
| Estradiol 17-beta-dehydrogenase 2             | HSD17B2     | P37059     | CHEMBL2789 | Enzyme                              | 0.0          | 0 / 2                 |
| Vascular endothelial growth factor receptor 2 | KDR         | P35968     | CHEMBL279  | Kinase                              | 0.0          | 0 / 1                 |
| Matrix metalloproteinase 13                   | MMP13       | P45452     | CHEMBL280  | Protease                            | 0.0          | 0 / 1                 |
| Matrix metalloproteinase 3                    | MMP3        | P08254     | CHEMBL283  | Protease                            | 0.0          | 0 / 1                 |
| Carbonic anhydrase III                        | CA3         | P07451     | CHEMBL2885 | Lyase                               | 0.0          | 0 / 1                 |
| Arachidonate 15-lipoxygenase                  | ALOX15      | P16050     | CHEMBL2903 | Enzyme                              | 0.0          | 0 / 3                 |
| Serine/threonine-protein kinase PLK1          | PLK1        | P53350     | CHEMBL3024 | Kinase                              | 0.0          | 0 / 1                 |
| Carbonic anhydrase VI                         | CA6         | P23280     | CHEMBL3025 | Lyase                               | 0.0          | 0 / 1                 |
| Cyclin-dependent kinase 1                     | CDK1        | P06493     | CHEMBL308  | Kinase                              | 0.0          | 0 / 1                 |
| Matrix metalloproteinase 9                    | MMP9        | P14780     | CHEMBL321  | Protease                            | 0.0          | 0 / 2                 |
| PI3-kinase p110-gamma subunit                 | PIK3CG      | P48736     | CHEMBL3267 | Enzyme                              | 0.0          | 0 / 1                 |
| Matrix metalloproteinase 2                    | MMP2        | P08253     | CHEMBL333  | Protease                            | 0.0          | 0 / 2                 |
| Protein kinase N1                             | PKN1        | Q16512     | CHEMBL3384 | Kinase                              | 0.0          | 0 / 1                 |
| Carbonic anhydrase XIV                        | CA14        | Q9ULX7     | CHEMBL3510 | Lyase                               | 0.0          | 0 / 1                 |
| Casein kinase II alpha                        | CSNK2A1     | P68400     | CHEMBL3629 | Kinase                              | 0.0          | 0 / 1                 |
| Arachidonate 12-lipoxygenase                  | ALOX12      | P18054     | CHEMBL3687 | Enzyme                              | 0.0          | 0 / 2                 |
| Hepatocyte growth factor receptor             | MET         | P08581     | CHEMBL3717 | Kinase                              | 0.0          | 0 / 1                 |
| Serine/threonine-protein kinase NEK2          | NEK2        | P51955     | CHEMBL3835 | Kinase                              | 0.0          | 0 / 1                 |
| Interleukin-8 receptor A                      | CXCR1       | P25024     | CHEMBL4029 | Family A G protein-coupled receptor | 0.0          | 0 / 1                 |
| CaM kinase II beta                            | CAMK2B      | Q13554     | CHEMBL4121 | Kinase                              | 0.0          | 0 / 1                 |
