# Supplementary material for: Water Extract from Inflorescences of Industrial Hemp Futura 75 Variety as a Source of Anti-Inflammatory, Anti-Proliferative and Antimycotic Agents: Results from In Silico, In Vitro and Ex Vivo Studies
Source: MDPI journal article supplement (doi:10.3390/antiox9050437), 2020-05-17
Supplement: s1 [file s1]

# SwissTargetPrediction

| Target                                  | Common name | Uniprot ID | ChEMBL ID     | Target Class                        | Probability*    | Known actives (3D/2D) |
|-----------------------------------------|-------------|------------|---------------|-------------------------------------|-----------------|-----------------------|
| Aldose reductase                        | AKR1B1      | P15121     | CHEMBL1900    | Enzyme                              | 1.0             | 28 / 24               |
| Aldo-keto reductase family 1 member B10 | AKR1B10     | O60218     | CHEMBL5983    | Enzyme                              | 1.0             | 2 / 18                |
| Matrix metalloproteinase 13             | MMP13       | P45452     | CHEMBL280     | Protease                            | 0.180919787145  | 2 / 3                 |
| Matrix metalloproteinase 2              | MMP2        | P08253     | CHEMBL333     | Protease                            | 0.180919787145  | 1 / 6                 |
| Matrix metalloproteinase 12             | MMP12       | P39900     | CHEMBL4393    | Protease                            | 0.130706652821  | 1 / 5                 |
| Beta amyloid A4 protein                 | APP         | P05067     | CHEMBL2487    | Membrane receptor                   | 0.113979814646  | 1 / 16                |
| Leukocyte elastase                      | ELANE       | P08246     | CHEMBL248     | Protease                            | 0.0972399887602 | 0 / 2                 |
| Glucose-6-phosphate translocase         | SLC37A4     | O43826     | CHEMBL3217398 | Electrochemical transporter         | 0.0972399887602 | 0 / 2                 |
| Liver glycogen phosphorylase            | PYGL        | P06737     | CHEMBL2568    | Enzyme                              | 0.0972399887602 | 12 / 1                |
| Protein kinase C delta (by homology)    | PRKCD       | Q05655     | CHEMBL2996    | Kinase                              | 0.0972399887602 | 0 / 51                |
| Protein kinase C alpha                  | PRKCA       | P17252     | CHEMBL299     | Kinase                              | 0.0972399887602 | 0 / 243               |
| Beta-secretase 1                        | BACE1       | P56817     | CHEMBL4822    | Protease                            | 0.0972399887602 | 0 / 3                 |
| Phosphodiesterase 5A                    | PDE5A       | O76074     | CHEMBL1827    | Phosphodiesterase                   | 0.0972399887602 | 0 / 1                 |
| Phosphodiesterase 4D                    | PDE4D       | Q08499     | CHEMBL288     | Phosphodiesterase                   | 0.0972399887602 | 0 / 3                 |
| Phosphodiesterase 9A                    | PDE9A       | O76083     | CHEMBL3535    | Phosphodiesterase                   | 0.0972399887602 | 0 / 1                 |
| Phosphodiesterase 1B                    | PDE1B       | Q01064     | CHEMBL4425    | Phosphodiesterase                   | 0.0972399887602 | 0 / 1                 |
| Carbonic anhydrase II                   | CA2         | P00918     | CHEMBL205     | Lyase                               | 0.0972399887602 | 59 / 24               |
| Carbonic anhydrase I                    | CA1         | P00915     | CHEMBL261     | Lyase                               | 0.0972399887602 | 46 / 33               |
| Carbonic anhydrase XII                  | CA12        | O43570     | CHEMBL3242    | Lyase                               | 0.0972399887602 | 26 / 32               |
| Carbonic anhydrase IX                   | CA9         | Q16790     | CHEMBL3594    | Lyase                               | 0.0972399887602 | 28 / 36               |
| Carbonic anhydrase VB                   | CA5B        | Q9Y2D0     | CHEMBL3969    | Lyase                               | 0.0972399887602 | 0 / 14                |
| Endothelin receptor ET-A (by homology)  | EDNRA       | P25101     | CHEMBL252     | Family A G protein-coupled receptor | 0.0972399887602 | 0 / 1                 |
| P-glycoprotein 1                        | ABCB1       | P08183     | CHEMBL4302    | Primary active transporter          | 0.0972399887602 | 0 / 72                |
| Sialidase 4                             | NEU4        | Q8WWR8     | CHEMBL4174    | Enzyme                              | 0.0             | 6 / 0                 |
| AMP deaminase 3                         | AMPD3       | Q01432     | CHEMBL2912    | Enzyme                              | 0.0             | 3 / 0                 |
| Monoglyceride lipase                    | MGLL        | Q99685     | CHEMBL4191    | Enzyme                              | 0.0             | 0 / 2                 |
| Receptor protein-tyrosine kinase erbB-2 | ERBB2       | P04626     | CHEMBL1824    | Kinase                              | 0.0             | 0 / 1                 |
| Epidermal growth factor receptor erbB1  | EGFR        | P00533     | CHEMBL203     | Kinase                              | 0.0             | 0 / 2                 |
| Cyclooxygenase-1                        | PTGS1       | P23219     | CHEMBL221     | Oxidoreductase                      | 0.0             | 0 / 1                 |
| Norepinephrine transporter              | SLC6A2      | P23975     | CHEMBL222     | Electrochemical transporter         | 0.0             | 0 / 3                 |
| MAP kinase ERK2                         | MAPK1       | P28482     | CHEMBL4040    | Kinase                              | 0.0             | 0 / 1                 |
| Aldo-keto reductase family 1 member C4  | AKR1C4      | P17516     | CHEMBL4999    | Enzyme                              | 0.0             | 0 / 1                 |
| Aldo-keto reductase family              | AKR1C2      | P52895     | CHEMBL5847    | Enzyme                              | 0.0             | 0 / 1                 |

| Target                                                        | Common name | Uniprot ID | ChEMBL ID  | Target Class             | Probability* | Known actives (3D/2D) |
|---------------------------------------------------------------|-------------|------------|------------|--------------------------|--------------|-----------------------|
| 1 member C2                                                   |             |            |            |                          |              |                       |
| Hematopoietic cell protein-tyrosine phosphatase 70Z-PEP       | PTPN22      | Q9Y2R2     | CHEMBL2889 | Phosphatase              | 0.0          | 4 / 0                 |
| Glutamate receptor ionotropic kainate 2                       | GRIK2       | Q13002     | CHEMBL3683 | Ligand-gated ion channel | 0.0          | 1 / 0                 |
| Glutamate receptor ionotropic kainate 3                       | GRIK3       | Q13003     | CHEMBL3684 | Ligand-gated ion channel | 0.0          | 1 / 0                 |
| Arachidonate 5-lipoxygenase                                   | ALOX5       | P09917     | CHEMBL215  | Oxidoreductase           | 0.0          | 0 / 13                |
| Hypoxanthine-guanine phosphoribosyltransferase                | HPRT1       | P00492     | CHEMBL2360 | Enzyme                   | 0.0          | 2 / 0                 |
| Inhibitor of nuclear factor kappa B kinase beta subunit       | IKBKB       | O14920     | CHEMBL1991 | Kinase                   | 0.0          | 0 / 3                 |
| Glutamate carboxypeptidase II                                 | FOLH1       | Q04609     | CHEMBL1892 | Protease                 | 0.0          | 20 / 0                |
| Tyrosine-protein kinase SRC                                   | SRC         | P12931     | CHEMBL267  | Kinase                   | 0.0          | 1 / 0                 |
| Caspase-3                                                     | CASP3       | P42574     | CHEMBL2334 | Protease                 | 0.0          | 10 / 0                |
| Caspase-6                                                     | CASP6       | P55212     | CHEMBL3308 | Protease                 | 0.0          | 3 / 0                 |
| Caspase-7                                                     | CASP7       | P55210     | CHEMBL3468 | Protease                 | 0.0          | 3 / 0                 |
| Caspase-8                                                     | CASP8       | Q14790     | CHEMBL3776 | Protease                 | 0.0          | 3 / 0                 |
| Caspase-1                                                     | CASP1       | P29466     | CHEMBL4801 | Protease                 | 0.0          | 3 / 0                 |
| Caspase-2                                                     | CASP2       | P42575     | CHEMBL4884 | Protease                 | 0.0          | 2 / 0                 |
| Hepatocyte growth factor receptor                             | MET         | P08581     | CHEMBL3717 | Kinase                   | 0.0          | 0 / 18                |
| Tyrosinase                                                    | TYR         | P14679     | CHEMBL1973 | Oxidoreductase           | 0.0          | 8 / 0                 |
| Sialidase 3                                                   | NEU3        | Q9UQ49     | CHEMBL3046 | Enzyme                   | 0.0          | 4 / 0                 |
| Sialidase 2                                                   | NEU2        | Q9Y3R4     | CHEMBL3200 | Enzyme                   | 0.0          | 4 / 0                 |
| Tyrosyl-tRNA synthetase                                       | YARS        | P54577     | CHEMBL3179 | Enzyme                   | 0.0          | 12 / 0                |
| Low molecular weight phosphotyrosine protein phosphatase      | ACP1        | P24666     | CHEMBL4903 | Phosphatase              | 0.0          | 0 / 1                 |
| PI3-kinase p110-gamma subunit                                 | PIK3CG      | P48736     | CHEMBL3267 | Enzyme                   | 0.0          | 1 / 0                 |
| Endothelin-converting enzyme 1                                | ECE1        | P42892     | CHEMBL4791 | Protease                 | 0.0          | 4 / 0                 |
| DNA polymerase beta                                           | POLB        | P06746     | CHEMBL2392 | Enzyme                   | 0.0          | 3 / 4                 |
| Trehalase                                                     | TREH        | O43280     | CHEMBL3087 | Enzyme                   | 0.0          | 1 / 0                 |
| Carbonic anhydrase VII                                        | CA7         | P43166     | CHEMBL2326 | Lyase                    | 0.0          | 5 / 23                |
| Carbonic anhydrase XIV                                        | CA14        | Q9ULX7     | CHEMBL3510 | Lyase                    | 0.0          | 12 / 22               |
| Carbonic anhydrase IV                                         | CA4         | P22748     | CHEMBL3729 | Lyase                    | 0.0          | 6 / 15                |
| Carbonic anhydrase XIII                                       | CA13        | Q8N1Q1     | CHEMBL3912 | Lyase                    | 0.0          | 3 / 16                |
| Carbonic anhydrase VA                                         | CA5A        | P35218     | CHEMBL4789 | Lyase                    | 0.0          | 4 / 19                |
| Dual-specificity tyrosine-phosphorylation regulated kinase 1A | DYRK1A      | Q13627     | CHEMBL2292 | Kinase                   | 0.0          | 0 / 8                 |
| Dual specificty protein kinase CLK1                           | CLK1        | P49759     | CHEMBL4224 | Kinase                   | 0.0          | 0 / 3                 |

| Target                                                        | Common name | Uniprot ID | ChEMBL ID  | Target Class                        | Probability* | Known actives (3D/2D) |
|---------------------------------------------------------------|-------------|------------|------------|-------------------------------------|--------------|-----------------------|
| Dual specificity tyrosine-phosphorylation-regulated kinase 1B | DYRK1B      | Q9Y463     | CHEMBL5543 | Kinase                              | 0.0          | 0 / 7                 |
| Neuropilin-1                                                  | NRP1        | O14786     | CHEMBL5174 | Secreted protein                    | 0.0          | 1 / 0                 |
| Angiotensin-converting enzyme (by homology)                   | ACE         | P12821     | CHEMBL1808 | Protease                            | 0.0          | 12 / 0                |
| Thrombin                                                      | F2          | P00734     | CHEMBL204  | Protease                            | 0.0          | 1 / 0                 |
| Matrix metalloproteinase 16                                   | MMP16       | P51512     | CHEMBL2200 | Protease                            | 0.0          | 1 / 0                 |
| Matrix metalloproteinase 14                                   | MMP14       | P50281     | CHEMBL3869 | Protease                            | 0.0          | 1 / 0                 |
| Alpha-L-fucosidase I                                          | FUCA1       | P04066     | CHEMBL4176 | Enzyme                              | 0.0          | 1 / 0                 |
| Matrix metalloproteinase 8                                    | MMP8        | P22894     | CHEMBL4588 | Protease                            | 0.0          | 2 / 0                 |
| Insulin-like growth factor I receptor                         | IGF1R       | P08069     | CHEMBL1957 | Kinase                              | 0.0          | 1 / 0                 |
| Insulin receptor                                              | INSR        | P06213     | CHEMBL1981 | Kinase                              | 0.0          | 1 / 0                 |
| Butyrylcholinesterase                                         | BCHE        | P06276     | CHEMBL1914 | Hydrolase                           | 0.0          | 0 / 3                 |
| Maltase-glucoamylase                                          | MGAM        | O43451     | CHEMBL2074 | Hydrolase                           | 0.0          | 8 / 0                 |
| Sucrase-isomaltase                                            | SI          | P14410     | CHEMBL2748 | Enzyme                              | 0.0          | 8 / 0                 |
| Folylpoly-gamma-glutamate synthetase                          | FPGS        | Q05932     | CHEMBL3171 | Enzyme                              | 0.0          | 1 / 0                 |
| ATP-citrate synthase                                          | ACLY        | P53396     | CHEMBL3720 | Enzyme                              | 0.0          | 3 / 0                 |
| Pancreatic alpha-amylase                                      | AMY2A       | P04746     | CHEMBL2045 | Hydrolase                           | 0.0          | 1 / 0                 |
| Neprilysin                                                    | MME         | P08473     | CHEMBL1944 | Protease                            | 0.0          | 9 / 0                 |
| Aminopeptidase A                                              | ENPEP       | Q07075     | CHEMBL3439 | Protease                            | 0.0          | 15 / 0                |
| Carbonic anhydrase VI                                         | CA6         | P23280     | CHEMBL3025 | Lyase                               | 0.0          | 1 / 16                |
| Aldehyde dehydrogenase                                        | ALDH2       | P05091     | CHEMBL1935 | Oxidoreductase                      | 0.0          | 1 / 0                 |
| Hydroxycarboxylic acid receptor 2                             | HCAR2       | Q8TDS4     | CHEMBL3785 | Family A G protein-coupled receptor | 0.0          | 1 / 0                 |
| Sodium/glucose cotransporter 2                                | SLC5A2      | P31639     | CHEMBL3884 | Electrochemical transporter         | 0.0          | 4 / 0                 |
| Matrix metalloproteinase 1                                    | MMP1        | P03956     | CHEMBL332  | Protease                            | 0.0          | 3 / 7                 |
| NAALADase II                                                  | NAALAD2     | Q9Y3Q0     | CHEMBL2609 | Protease                            | 0.0          | 6 / 0                 |
| Aldo-keto-reductase family 1 member C3                        | AKR1C3      | P42330     | CHEMBL4681 | Enzyme                              | 0.0          | 3 / 13                |
| Thymidylate synthase                                          | TYMS        | P04818     | CHEMBL1952 | Transferase                         | 0.0          | 4 / 0                 |
| Matrix metalloproteinase 9                                    | MMP9        | P14780     | CHEMBL321  | Protease                            | 0.0          | 1 / 4                 |
| Insulin-like growth factor binding protein 3                  | IGFBP3      | P17936     | CHEMBL3997 | Secreted protein                    | 0.0          | 6 / 0                 |
| HMG-CoA reductase (by homology)                               | HMGCR       | P04035     | CHEMBL402  | Oxidoreductase                      | 0.0          | 0 / 34                |
| Monoamine oxidase B                                           | MAOB        | P27338     | CHEMBL2039 | Oxidoreductase                      | 0.0          | 0 / 1                 |
| Histone deacetylase 3                                         | HDAC3       | O15379     | CHEMBL1829 | Eraser                              | 0.0          | 1 / 0                 |
| Histone deacetylase 6                                         | HDAC6       | Q9UBN7     | CHEMBL1865 | Eraser                              | 0.0          | 1 / 0                 |
| Histone deacetylase 2                                         | HDAC2       | Q92769     | CHEMBL1937 | Eraser                              | 0.0          | 1 / 0                 |
| Vascular endothelial                                          | KDR         | P35968     | CHEMBL279  | Kinase                              | 0.0          | 2 / 0                 |

| Target                        | Common name | Uniprot ID | ChEMBL ID     | Target Class                        | Probability* | Known actives (3D/2D) |
|-------------------------------|-------------|------------|---------------|-------------------------------------|--------------|-----------------------|
| growth factor receptor 2      |             |            |               |                                     |              |                       |
| Histone deacetylase 1         | HDAC1       | Q13547     | CHEMBL325     | Eraser                              | 0.0          | 1 / 0                 |
| G-protein coupled receptor 35 | GPR35       | Q9HC97     | CHEMBL1293267 | Family A G protein-coupled receptor | 0.0          | 2 / 0                 |
