# Supplementary material for: Water Extract from Inflorescences of Industrial Hemp Futura 75 Variety as a Source of Anti-Inflammatory, Anti-Proliferative and Antimycotic Agents: Results from In Silico, In Vitro and Ex Vivo Studies
Source: MDPI journal article supplement (doi:10.3390/antiox9050437), 2020-05-17
Supplement: s1 [file s1]

# SwissTargetPrediction

| Target                                                                                       | Common name | Uniprot ID | ChEMBL ID     | Target Class                        | Probability*    | Known actives (3D/2D) |
|----------------------------------------------------------------------------------------------|-------------|------------|---------------|-------------------------------------|-----------------|-----------------------|
| Collagenase 3 (by homology)                                                                  | Mmp13       | P33435     | CHEMBL3638350 | Hydrolase                           | 0.180919787145  | 2 / 3                 |
| Matrix metalloproteinase-2 (by homology)                                                     | Mmp2        | P33434     | CHEMBL3095    | Protease                            | 0.180919787145  | 1 / 6                 |
| Liver glycogen phosphorylase (by homology)                                                   | Pygl        | Q9ET01     | CHEMBL3008    | Enzyme                              | 0.0972399887602 | 12 / 1                |
| Protein kinase C alpha                                                                       | Prkca       | P20444     | CHEMBL2567    | Kinase                              | 0.0972399887602 | 0 / 198               |
| Protein kinase C delta                                                                       | Prkcd       | P28867     | CHEMBL2560    | Kinase                              | 0.0972399887602 | 0 / 51                |
| Beta-secretase 1 (by homology)                                                               | Bace1       | P56818     | CHEMBL4593    | Protease                            | 0.0972399887602 | 0 / 3                 |
| Endothelin receptor ET-A (by homology)                                                       | Ednra       | Q61614     | CHEMBL2286    | Family A G protein-coupled receptor | 0.0972399887602 | 0 / 1                 |
| P-glycoprotein 3 (by homology)                                                               | Abcb1a      | P21447     | CHEMBL2573    | Primary active transporter          | 0.0972399887602 | 0 / 72                |
| P-glycoprotein 1 (by homology)                                                               | Abcb1b      | P06795     | CHEMBL3467    | Primary active transporter          | 0.0972399887602 | 0 / 72                |
| Monoglyceride lipase (by homology)                                                           | Mgll        | O35678     | CHEMBL5774    | Enzyme                              | 0.0             | 0 / 2                 |
| Epidermal growth factor receptor erbB1 (by homology)                                         | Egfr        | Q01279     | CHEMBL3608    | Kinase                              | 0.0             | 0 / 2                 |
| Cyclooxygenase-1 (by homology)                                                               | Ptgs1       | P22437     | CHEMBL2649    | Enzyme                              | 0.0             | 0 / 1                 |
| Norepinephrine transporter (by homology)                                                     | Slc6a2      | O55192     | CHEMBL2370    | Electrochemical transporter         | 0.0             | 0 / 3                 |
| MAP kinase ERK2 (by homology)                                                                | Mapk1       | P63085     | CHEMBL2207    | Kinase                              | 0.0             | 0 / 1                 |
| Arachidonate 5-lipoxygenase (by homology)                                                    | Alox5       | P48999     | CHEMBL5211    | Oxidoreductase                      | 0.0             | 0 / 13                |
| Caspase-1 (by homology)                                                                      | Casp1       | P29452     | CHEMBL4800    | Protease                            | 0.0             | 3 / 0                 |
| Tyrosinase (by homology)                                                                     | Tyr         | P11344     | CHEMBL5346    | Oxidoreductase                      | 0.0             | 8 / 0                 |
| Phosphatidylinositol 4,5-bisphosphate 3-kinase catalytic subunit gamma isoform (by homology) | Pik3cg      | Q9JHG7     | CHEMBL2189158 | Enzyme                              | 0.0             | 1 / 0                 |
| DNA polymerase beta (by homology)                                                            | Polb        | Q8K409     | CHEMBL4565    | Enzyme                              | 0.0             | 3 / 4                 |
| Carbonic anhydrase XIII (by homology)                                                        | Ca13        | Q9D6N1     | CHEMBL2186    | Enzyme                              | 0.0             | 3 / 16                |
| Carbonic anhydrase VII (by homology)                                                         | Ca7         | Q9ERQ8     | CHEMBL2216    | Enzyme                              | 0.0             | 5 / 23                |
| Dual-specificity tyrosine-phosphorylation regulated kinase 1A (by homology)                  | Dyrk1a      | Q61214     | CHEMBL4750    | Kinase                              | 0.0             | 0 / 8                 |

| Target                                                | Common name | Uniprot ID | ChEMBL ID     | Target Class                        | Probability* | Known actives (3D/2D) |
|-------------------------------------------------------|-------------|------------|---------------|-------------------------------------|--------------|-----------------------|
| homology)                                             |             |            |               |                                     |              |                       |
| Dual specificity protein kinase CLK1 (by homology)    | Clk1        | P22518     | CHEMBL1075280 | Enzyme                              | 0.0          | 0 / 3                 |
| Angiotensin-converting enzyme (by homology)           | Ace         | P09470     | CHEMBL2994    | Protease                            | 0.0          | 12 / 0                |
| Thrombin (by homology)                                | F2          | P19221     | CHEMBL1075308 | Protease                            | 0.0          | 1 / 0                 |
| Insulin receptor (by homology)                        | Insr        | P15208     | CHEMBL3187    | Kinase                              | 0.0          | 1 / 0                 |
| Butyrylcholinesterase (by homology)                   | Bche        | Q03311     | CHEMBL2528    | Hydrolase                           | 0.0          | 0 / 3                 |
| Folylpoly-gamma-glutamate synthetase (by homology)    | Fpgs        | P48760     | CHEMBL2890    | Enzyme                              | 0.0          | 1 / 0                 |
| Neprilysin (by homology)                              | Mme         | Q61391     | CHEMBL2642    | Protease                            | 0.0          | 9 / 0                 |
| Hydroxycarboxylic acid receptor 2 (by homology)       | Hcar2       | Q9EP66     | CHEMBL4420    | Family A G protein-coupled receptor | 0.0          | 1 / 0                 |
| Sodium/glucose cotransporter 2 (by homology)          | Slc5a2      | Q923I7     | CHEMBL1075302 | Electrochemical transporter         | 0.0          | 4 / 0                 |
| Aldo-keto reductase family 1 member C21 (by homology) | Akr1c21     | Q91WR5     | CHEMBL1075270 | Enzyme                              | 0.0          | 3 / 13                |
| Thymidylate synthase                                  | Tyms        | P07607     | CHEMBL3160    | Transferase                         | 0.0          | 4 / 0                 |
| Matrix metalloproteinase 9 (by homology)              | Mmp9        | P41245     | CHEMBL2214    | Protease                            | 0.0          | 1 / 4                 |
| HMG-CoA reductase (by homology)                       | Hmgcr       | Q01237     | CHEMBL2764    | Oxidoreductase                      | 0.0          | 0 / 34                |
| Monoamine oxidase B (by homology)                     | Maob        | Q8BW75     | CHEMBL3050    | Enzyme                              | 0.0          | 0 / 1                 |
| Histone deacetylase 6 (by homology)                   | Hdac6       | Q9Z2V5     | CHEMBL2878    | Eraser                              | 0.0          | 1 / 0                 |
| Histone deacetylase 1 (by homology)                   | Hdac1       | O09106     | CHEMBL4001    | Eraser                              | 0.0          | 1 / 0                 |
| Transcription factor HES-1                            | Hes1        | P35428     | CHEMBL1075292 | Transcription factor                | 0.0          | 1 / 0                 |
| Protein-tyrosine phosphatase 1B (by homology)         | Ptpn1       | P35821     | CHEMBL3336    | Phosphatase                         | 0.0          | 2 / 15                |
| Cyclin-dependent kinase 1 (by homology)               | Cdk1        | P11440     | CHEMBL4084    | Kinase                              | 0.0          | 1 / 0                 |
| Cytidine deaminase                                    | Cda         | P56389     | CHEMBL2110    | Enzyme                              | 0.0          | 1 / 0                 |
| P-selectin (by homology)                              | Selp        | Q01102     | CHEMBL2455    | Adhesion                            | 0.0          | 5 / 0                 |
| SGLT1 protein (by homology)                           | Slc5a1      | Q9QXI6     | CHEMBL1744523 | Unclassified protein                | 0.0          | 3 / 0                 |
| Toll-like receptor 4                                  | Tlr4        | Q9QUK6     | CHEMBL1795167 | Toll-like and Il-1 receptors        | 0.0          | 0 / 7                 |
| Dopamine transporter (by homology)                    | Slc6a3      | Q61327     | CHEMBL2799    | Electrochemical transporter         | 0.0          | 0 / 17                |

| Target                                                      | Common name | Uniprot ID | ChEMBL ID     | Target Class                        | Probability* | Known actives (3D/2D) |
|-------------------------------------------------------------|-------------|------------|---------------|-------------------------------------|--------------|-----------------------|
| Casein kinase II alpha (by homology)                        | Csnk2a1     | Q60737     | CHEMBL3537    | Kinase                              | 0.0          | 1 / 0                 |
| Casein kinase II alpha (prime) (by homology)                | Csnk2a2     | O54833     | CHEMBL5326    | Kinase                              | 0.0          | 1 / 0                 |
| Dihydroorotate dehydrogenase (by homology)                  | Dhodh       | O35435     | CHEMBL2991    | Oxidoreductase                      | 0.0          | 1 / 0                 |
| Tyrosine-protein kinase FYN (by homology)                   | Fyn         | P39688     | CHEMBL4517    | Kinase                              | 0.0          | 2 / 2                 |
| Adenosylhomocysteinase (by homology)                        | Ahcy        | P50247     | CHEMBL2389    | Enzyme                              | 0.0          | 3 / 0                 |
| AICAR transformylase (by homology)                          | Atic        | Q9CWWJ9    | CHEMBL2277    | Enzyme                              | 0.0          | 1 / 0                 |
| G protein-coupled receptor 44 (by homology)                 | Ptgdr2      | Q9Z2J6     | CHEMBL2291    | Family A G protein-coupled receptor | 0.0          | 3 / 0                 |
| Aminopeptidase N (by homology)                              | Anpep       | P97449     | CHEMBL2189140 | Protease                            | 0.0          | 3 / 0                 |
| Leukocyte adhesion molecule-1 (by homology)                 | Sell        | P18337     | CHEMBL3162    | Adhesion                            | 0.0          | 2 / 0                 |
| DNA (cytosine-5)-methyltransferase 1 (by homology)          | Dnmt1       | P13864     | CHEMBL3351195 | Writer                              | 0.0          | 1 / 0                 |
| Histone-arginine methyltransferase CARM1 (by homology)      | Carm1       | Q9WVG6     | CHEMBL5538    | Writer                              | 0.0          | 1 / 0                 |
| Histone-lysine N-methyltransferase EHMT2 (by homology)      | Ehmt2       | Q9Z148     | CHEMBL2169718 | Writer                              | 0.0          | 1 / 0                 |
| Inosine-5'-monophosphate dehydrogenase 2 (by homology)      | Impdh2      | P24547     | CHEMBL3169    | Oxidoreductase                      | 0.0          | 3 / 0                 |
| Tyrosine-protein kinase LCK (by homology)                   | Lck         | P06240     | CHEMBL2480    | Kinase                              | 0.0          | 1 / 1                 |
| B-cell receptor CD22                                        | Cd22        | P35329     | CHEMBL1075279 | Adhesion                            | 0.0          | 1 / 0                 |
| Renin (by homology)                                         | Ren1        | P06281     | CHEMBL2615    | Protease                            | 0.0          | 1 / 0                 |
| Adenosine A2b receptor (by homology)                        | Adora2b     | Q60614     | CHEMBL2237    | Family A G protein-coupled receptor | 0.0          | 0 / 1                 |
| Heat shock protein HSP 90-alpha (by homology)               | Hsp90aa1    | P07901     | CHEMBL4197    | Other cytosolic protein             | 0.0          | 3 / 3                 |
| Kappa opioid receptor (by homology)                         | Oprk1       | P33534     | CHEMBL4329    | Family A G protein-coupled receptor | 0.0          | 0 / 11                |
| Voltage-gated potassium channel subunit Kv1.3 (by homology) | Kcna3       | P16390     | CHEMBL4818    | Voltage-gated ion channel           | 0.0          | 0 / 2                 |
| Protein kinase C eta (by homology)                          | Prkch       | P23298     | CHEMBL4992    | Kinase                              | 0.0          | 0 / 8                 |
| Protein kinase C theta type (by homology)                   | Prkcq       | Q02111     | CHEMBL1075295 | Kinase                              | 0.0          | 0 / 11                |

| Target                                                           | Common name | Uniprot ID | ChEMBL ID     | Target Class                        | Probability* | Known actives (3D/2D) |
|------------------------------------------------------------------|-------------|------------|---------------|-------------------------------------|--------------|-----------------------|
| Estrogen receptor alpha (by homology)                            | Esr1        | P19785     | CHEMBL3065    | Nuclear receptor                    | 0.0          | 1 / 1                 |
| Androgen Receptor (by homology)                                  | Ar          | P19091     | CHEMBL3056    | Nuclear receptor                    | 0.0          | 0 / 4                 |
| Serotonin transporter (by homology)                              | Slc6a4      | Q60857     | CHEMBL4642    | Electrochemical transporter         | 0.0          | 0 / 5                 |
| Adenosine A1 receptor (by homology)                              | Adora1      | Q60612     | CHEMBL3688    | Family A G protein-coupled receptor | 0.0          | 10 / 1                |
| Muscarinic acetylcholine receptor M2 (by homology)               | Chrm2       | Q9ERZ4     | CHEMBL3197    | Family A G protein-coupled receptor | 0.0          | 0 / 11                |
| Muscarinic acetylcholine receptor M1 (by homology)               | Chrm1       | P12657     | CHEMBL3733    | Family A G protein-coupled receptor | 0.0          | 0 / 12                |
| Peroxisome proliferator-activated receptor alpha (by homology)   | Ppara       | P23204     | CHEMBL2128    | Nuclear receptor                    | 0.0          | 0 / 8                 |
| Transient receptor potential cation channel subfamily V member 4 | Trpv4       | Q9EPK8     | CHEMBL6126    | Voltage-gated ion channel           | 0.0          | 0 / 4                 |
| Delta opioid receptor (by homology)                              | Oprd1       | P32300     | CHEMBL3222    | Family A G protein-coupled receptor | 0.0          | 0 / 1                 |
| DNA topoisomerase I (by homology)                                | Top1        | Q04750     | CHEMBL2814    | Isomerase                           | 0.0          | 3 / 3                 |
| Nitric oxide synthase, inducible                                 | Nos2        | P29477     | CHEMBL3464    | Enzyme                              | 0.0          | 0 / 1                 |
| Estradiol 17-beta-dehydrogenase 2 (by homology)                  | Hsd17b2     | P51658     | CHEMBL1914270 | Enzyme                              | 0.0          | 0 / 1                 |
| Peroxisome proliferator-activated receptor gamma                 | Pparg       | P37238     | CHEMBL2459    | Nuclear receptor                    | 0.0          | 0 / 1                 |
| Acetylcholinesterase (by homology)                               | Ache        | P21836     | CHEMBL3198    | Hydrolase                           | 0.0          | 0 / 2                 |
| Peroxisome proliferator-activated receptor delta (by homology)   | Ppard       | P35396     | CHEMBL2458    | Nuclear receptor                    | 0.0          | 0 / 5                 |
| Cannabinoid CB1 receptor (by homology)                           | Cnr1        | P47746     | CHEMBL3037    | Family A G protein-coupled receptor | 0.0          | 0 / 1                 |
| Cannabinoid CB2 receptor (by homology)                           | Cnr2        | P47936     | CHEMBL5373    | Family A G protein-coupled receptor | 0.0          | 0 / 2                 |
| Adenosine A2a receptor (by homology)                             | Adora2a     | Q60613     | CHEMBL2115    | Family A G protein-coupled receptor | 0.0          | 6 / 1                 |
| Glucagon receptor (by homology)                                  | Gcgr        | Q61606     | CHEMBL4773    | Family B G protein-coupled receptor | 0.0          | 0 / 1                 |
| Dual specificity phosphatase Cdc25B (by homology)                | Cdc25b      | P30306     | CHEMBL2723    | Phosphatase                         | 0.0          | 0 / 1                 |

| Target                                             | Common name | Uniprot ID | ChEMBL ID     | Target Class                        | Probability* | Known actives (3D/2D) |
|----------------------------------------------------|-------------|------------|---------------|-------------------------------------|--------------|-----------------------|
| Sigma opioid receptor (by homology)                | Sigmar1     | O55242     | CHEMBL3465    | Membrane receptor                   | 0.0          | 0 / 1                 |
| Platelet activating factor receptor                | Ptafr       | Q62035     | CHEMBL3993    | Family A G protein-coupled receptor | 0.0          | 0 / 3                 |
| Serotonin 1a (5-HT1a) receptor (by homology)       | Htr1a       | Q64264     | CHEMBL3737    | Family A G protein-coupled receptor | 0.0          | 0 / 3                 |
| 11-beta-hydroxysteroid dehydrogenase 1             | Hsd11b1     | P50172     | CHEMBL3910    | Enzyme                              | 0.0          | 0 / 1                 |
| Testosterone 17-beta-dehydrogenase 3 (by homology) | Hsd17b3     | P70385     | CHEMBL1932905 | Enzyme                              | 0.0          | 0 / 1                 |
| Catechol O-methyltransferase (by homology)         | Comt        | O88587     | CHEMBL3286068 | Transferase                         | 0.0          | 0 / 1                 |
| Estrogen receptor beta (by homology)               | Esr2        | O08537     | CHEMBL2995    | Nuclear receptor                    | 0.0          | 1 / 1                 |
| PI3-kinase p110-alpha subunit (by homology)        | Pik3ca      | P42337     | CHEMBL2499    | Enzyme                              | 0.0          | 1 / 1                 |
| Cyclooxygenase-2 (by homology)                     | Ptgs2       | Q05769     | CHEMBL4321    | Oxidoreductase                      | 0.0          | 2 / 7                 |
| Mu opioid receptor (by homology)                   | Oprm1       | P42866     | CHEMBL2858    | Family A G protein-coupled receptor | 0.0          | 1 / 3                 |
| Glycogen synthase kinase-3 beta (by homology)      | Gsk3b       | Q9WV60     | CHEMBL1075321 | Kinase                              | 0.0          | 1 / 6                 |
| Epoxide hydratase                                  | Ephx2       | P34914     | CHEMBL4140    | Protease                            | 0.0          | 2 / 1                 |
