# Supplementary material for: Water Extract from Inflorescences of Industrial Hemp Futura 75 Variety as a Source of Anti-Inflammatory, Anti-Proliferative and Antimycotic Agents: Results from In Silico, In Vitro and Ex Vivo Studies
Source: MDPI journal article supplement (doi:10.3390/antiox9050437), 2020-05-17
Supplement: s1 [file s1]

# SwissTargetPrediction

| Target                                                                      | Common name | Uniprot ID | ChEMBL ID     | Target Class                        | Probability*    | Known actives (3D/2D) |
|-----------------------------------------------------------------------------|-------------|------------|---------------|-------------------------------------|-----------------|-----------------------|
| Aldose reductase                                                            | Akr1b1      | P07943     | CHEMBL2622    | Voltage-gated ion channel           | 1.0             | 28 / 24               |
| Aldose reductase-related protein 1 (by homology)                            | Akr1b7      | Q5RJP0     | CHEMBL3421523 | Enzyme                              | 1.0             | 2 / 18                |
| Acidic alpha-glucosidase                                                    | Gaa         | Q6P7A9     | CHEMBL3513    | Enzyme                              | 0.130706652821  | 2 / 2                 |
| Amyloid beta A4 protein (by homology)                                       | App         | P08592     | CHEMBL3638365 | Secreted protein                    | 0.113979814646  | 1 / 16                |
| Liver glycogen phosphorylase (by homology)                                  | Pygl        | P09811     | CHEMBL3239    | Enzyme                              | 0.0972399887602 | 12 / 1                |
| Carbonic anhydrase II (by homology)                                         | Ca2         | P27139     | CHEMBL4706    | Transferase                         | 0.0972399887602 | 59 / 24               |
| Endothelin receptor ET-A                                                    | Ednra       | P26684     | CHEMBL4566    | Enzyme                              | 0.0972399887602 | 0 / 1                 |
| Arachidonate 12-lipoxygenase                                                | Alox15      | Q02759     | CHEMBL2741    | Protease                            | 0.0             | 0 / 9                 |
| Arachidonate 5-lipoxygenase                                                 | Alox5       | P12527     | CHEMBL312     | Transferase                         | 0.0             | 0 / 9                 |
| Arachidonate 15-lipoxygenase, type II                                       | Alox15b     | Q8K4F2     | CHEMBL3289    | Family A G protein-coupled receptor | 0.0             | 0 / 8                 |
| Glutamate carboxypeptidase II                                               | Folh1       | P70627     | CHEMBL5098    | Enzyme                              | 0.0             | 10 / 0                |
| DNA polymerase beta                                                         | Polb        | P06766     | CHEMBL4343    | Protease                            | 0.0             | 3 / 4                 |
| Dual specificity tyrosine-phosphorylation-regulated kinase 1A (by homology) | Dyrk1a      | Q63470     | CHEMBL5508    | Electrochemical transporter         | 0.0             | 0 / 8                 |
| Neuropilin-1 (by homology)                                                  | Nrp1        | Q9QWJ9     | CHEMBL3309098 | Phosphodiesterase                   | 0.0             | 1 / 0                 |
| Angiotensin-converting enzyme                                               | Ace         | P47820     | CHEMBL2625    | Ligand-gated ion channel            | 0.0             | 12 / 0                |
| Alpha-L-fucosidase I (by homology)                                          | Fuca1       | P17164     | CHEMBL2710    | Enzyme                              | 0.0             | 1 / 0                 |
| Poly(ADP-ribose) glycohydrolase                                             | Parg        | Q9QYM2     | CHEMBL3317337 | Family A G protein-coupled receptor | 0.0             | 1 / 0                 |
| Neprilysin                                                                  | Mme         | P07861     | CHEMBL3369    | Enzyme                              | 0.0             | 9 / 0                 |
| Glutamate receptor ionotropic kainate 3                                     | Grik3       | P42264     | CHEMBL3744    | Kinase                              | 0.0             | 2 / 0                 |
| Glutamate receptor ionotropic kainate 1                                     | Grik1       | P22756     | CHEMBL2919    | Ligand-gated ion channel            | 0.0             | 4 / 0                 |
| Hydroxycarboxylic acid receptor 2 (by homology)                             | Hcar2       | Q80Z39     | CHEMBL4731    | Enzyme                              | 0.0             | 1 / 0                 |
| Thymidylate synthase (by homology)                                          | Tyms        | P45352     | CHEMBL4341    | Family A G protein-coupled receptor | 0.0             | 4 / 0                 |
| HMG-CoA reductase                                                           | Hmgcr       | P51639     | CHEMBL3247    | Enzyme                              | 0.0             | 0 / 34                |
| Histone deacetylase 1 (by homology)                                         | Hdac1       | Q4QQW4     | CHEMBL2915    | Nuclear receptor                    | 0.0             | 1 / 0                 |
| Anionic trypsin-1 (by homology)                                             | Prss1       | P00762     | CHEMBL3638328 | Hydrolase                           | 0.0             | 2 / 0                 |

| Target                                                                          | Common name  | Uniprot ID       | ChEMBL ID     | Target Class                        | Probability* | Known actives (3D/2D) |
|---------------------------------------------------------------------------------|--------------|------------------|---------------|-------------------------------------|--------------|-----------------------|
| Monoglyceride lipase                                                            | Mgll         | Q8R431           | CHEMBL3321    | Voltage-gated ion channel           | 0.0          | 0 / 1                 |
| G protein-coupled receptor 80                                                   | Oxgr1        | Q6Y1R5           | CHEMBL2325    | Enzyme                              | 0.0          | 3 / 0                 |
| Dopamine transporter (by homology)                                              | Slc6a3       | P23977           | CHEMBL338     | Electrochemical transporter         | 0.0          | 0 / 17                |
| Glutamate receptor ionotropic, AMPA 2                                           | Gria2        | P19491           | CHEMBL3503    | Ligand-gated ion channel            | 0.0          | 1 / 0                 |
| Glutamate receptor ionotropic, AMPA 3                                           | Gria3        | P19492           | CHEMBL3504    | Ligand-gated ion channel            | 0.0          | 1 / 0                 |
| Glutamate receptor ionotropic, AMPA 1                                           | Gria1        | P19490           | CHEMBL3753    | Ligand-gated ion channel            | 0.0          | 1 / 0                 |
| Sodium/glucose cotransporter 2                                                  | Slc5a2       | P53792           | CHEMBL4316    | Electrochemical transporter         | 0.0          | 1 / 0                 |
| Sodium/glucose cotransporter 1                                                  | Slc5a1       | P53790           | CHEMBL5374    | Electrochemical transporter         | 0.0          | 1 / 0                 |
| Dihydroorotate dehydrogenase (by homology)                                      | Dhodh        | Q63707           | CHEMBL2383    | Voltage-gated ion channel           | 0.0          | 1 / 0                 |
| Adenosylhomocysteinase (by homology)                                            | Ahcy         | P10760           | CHEMBL3118    | Family A G protein-coupled receptor | 0.0          | 3 / 0                 |
| Purine-nucleoside phosphorylase (by homology)                                   | Pnp          | P85973           | CHEMBL2395    | Protease                            | 0.0          | 2 / 0                 |
| Glutamate NMDA receptor; Grin1/Grin2b                                           | Grin1/Grin2b | P35439<br>Q00960 | CHEMBL2096666 | Ligand-gated ion channel            | 0.0          | 1 / 0                 |
| Glutamate NMDA receptor; Grin1/Grin2a                                           | Grin1/Grin2a | P35439<br>Q00959 | CHEMBL2096680 | Ligand-gated ion channel            | 0.0          | 1 / 0                 |
| Glutamate NMDA receptor; Grin1/Grin2c                                           | Grin1/Grin2c | P35439<br>Q00961 | CHEMBL2096911 | Voltage-gated ion channel           | 0.0          | 2 / 0                 |
| Metabotropic glutamate receptor 2                                               | Grm2         | P31421           | CHEMBL2851    | Family C G protein-coupled receptor | 0.0          | 1 / 0                 |
| Trehalase                                                                       | N/A          | O70282           | CHEMBL3248    | Enzyme                              | 0.0          | 1 / 0                 |
| Protein kinase C gamma (by homology)                                            | Prkcg        | P63319           | CHEMBL3604    | Structural protein                  | 0.0          | 0 / 13                |
| Renin (by homology)                                                             | Ren1         | P08424           | CHEMBL2322    | Family A G protein-coupled receptor | 0.0          | 1 / 0                 |
| Solute carrier family 2, facilitated glucose transporter member 1 (by homology) | Slc2a1       | P11167           | CHEMBL5214    | Enzyme                              | 0.0          | 0 / 7                 |
| RAS guanyl releasing protein 1 (by homology)                                    | Rasgrp1      | Q9R1K8           | CHEMBL3109    | Ligand-gated ion channel            | 0.0          | 0 / 5                 |
| Squalene synthetase                                                             | Fdft1        | Q02769           | CHEMBL3815    | Enzyme                              | 0.0          | 54 / 34               |
| Kappa opioid receptor (by homology)                                             | Oprk1        | P34975           | CHEMBL3614    | Family A G protein-coupled receptor | 0.0          | 0 / 11                |
| Vanilloid receptor                                                              | Trpv1        | O35433           | CHEMBL5102    | Voltage-gated ion channel           | 0.0          | 0 / 12                |
| Protein kinase C alpha                                                          | Prkca        | P05696           | CHEMBL2855    | Nuclear receptor                    | 0.0          | 0 / 4                 |
| Androgen Receptor (by homology)                                                 | Ar           | P15207           | CHEMBL3072    | Enzyme                              | 0.0          | 0 / 4                 |
| Serotonin transporter                                                           | Slc6a4       | P31652           | CHEMBL313     | Enzyme                              | 0.0          | 0 / 5                 |

| Target                                                                         | Common name | Uniprot ID       | ChEMBL ID     | Target Class                        | Probability* | Known actives (3D/2D) |
|--------------------------------------------------------------------------------|-------------|------------------|---------------|-------------------------------------|--------------|-----------------------|
| (by homology)                                                                  |             |                  |               |                                     |              |                       |
| Adenosine A1 receptor                                                          | Adora1      | P25099           | CHEMBL318     | Family A G protein-coupled receptor | 0.0          | 10 / 1                |
| 72 kDa type IV collagenase                                                     | Mmp2        | P33436           | CHEMBL1075175 | Family A G protein-coupled receptor | 0.0          | 0 / 1                 |
| Muscarinic acetylcholine receptor M5 (by homology)                             | Chrm5       | P08911           | CHEMBL277     | Lyase                               | 0.0          | 0 / 12                |
| Muscarinic acetylcholine receptor M2 (by homology)                             | Chrm2       | P10980           | CHEMBL309     | Electrochemical transporter         | 0.0          | 0 / 11                |
| Muscarinic acetylcholine receptor M1 (by homology)                             | Chrm1       | P08482           | CHEMBL276     | Family A G protein-coupled receptor | 0.0          | 0 / 12                |
| Muscarinic acetylcholine receptor M3 (by homology)                             | Chrm3       | P08483           | CHEMBL320     | Family A G protein-coupled receptor | 0.0          | 0 / 11                |
| Peroxisome proliferator-activated receptor alpha (by homology)                 | Ppara       | P37230           | CHEMBL2129    | Enzyme                              | 0.0          | 0 / 8                 |
| Peroxisome proliferator-activated receptor gamma (by homology)                 | Pparg       | O88275           | CHEMBL4797    | Nuclear receptor                    | 0.0          | 0 / 6                 |
| Protein farnesyltransferase                                                    | Fntb/Fnta   | Q02293<br>Q04631 | CHEMBL2095197 | Voltage-gated ion channel           | 0.0          | 0 / 1                 |
| Squalene monooxygenase                                                         | Sqle        | P52020           | CHEMBL4241    | Family A G protein-coupled receptor | 0.0          | 0 / 4                 |
| Transient receptor potential cation channel subfamily V member 4 (by homology) | Trpv4       | Q9ERZ8           | CHEMBL2775    | Enzyme                              | 0.0          | 0 / 4                 |
| Delta opioid receptor (by homology)                                            | Oprd1       | P33533           | CHEMBL269     | Family A G protein-coupled receptor | 0.0          | 0 / 1                 |
| Testosterone 17-beta-dehydrogenase 3                                           | Hsd17b3     | O54939           | CHEMBL1075158 | Enzyme                              | 0.0          | 0 / 2                 |
| Neuronal acetylcholine receptor protein alpha-7 subunit                        | Chrna7      | Q05941           | CHEMBL4980    | Hydrolase                           | 0.0          | 0 / 1                 |
| DNA topoisomerase 1 (by homology)                                              | Top1        | Q9WUL0           | CHEMBL1075164 | Enzyme                              | 0.0          | 3 / 3                 |
| Cannabinoid CB1 receptor                                                       | Cnr1        | P20272           | CHEMBL3571    | Other cytosolic protein             | 0.0          | 0 / 1                 |
| Cannabinoid CB2 receptor (by homology)                                         | Cnr2        | Q9QZN9           | CHEMBL2470    | Unclassified protein                | 0.0          | 0 / 2                 |
| Adenosine A2a receptor                                                         | Adora2a     | P30543           | CHEMBL302     | Family A G protein-coupled receptor | 0.0          | 6 / 1                 |
| Glucagon receptor (by homology)                                                | Gcgr        | P30082           | CHEMBL4720    | Cytochrome P450                     | 0.0          | 0 / 1                 |
| Alpha-1a adrenergic receptor (by homology)                                     | Adra1a      | P43140           | CHEMBL319     | Ligand-gated ion channel            | 0.0          | 0 / 1                 |
| Sigma opioid receptor                                                          | Sigmar1     | Q9R0C9           | CHEMBL3602    | Other cytosolic protein             | 0.0          | 0 / 1                 |
| Platelet activating factor                                                     | Ptafr       | P46002           | CHEMBL4127    | Enzyme                              | 0.0          | 0 / 3                 |

| Target                                         | Common name | Uniprot ID | ChEMBL ID     | Target Class                        | Probability* | Known actives (3D/2D) |
|------------------------------------------------|-------------|------------|---------------|-------------------------------------|--------------|-----------------------|
| receptor (by homology)                         |             |            |               |                                     |              |                       |
| Monocarboxylate transporter 1                  | Slc16a1     | P53987     | CHEMBL2073709 | Enzyme                              | 0.0          | 0 / 2                 |
| Glycine receptor subunit alpha-2 (by homology) | Gla2        | P22771     | CHEMBL2328    | Family A G protein-coupled receptor | 0.0          | 0 / 1                 |
| Catechol O-methyltransferase                   | Comt        | P22734     | CHEMBL2372    | Ligand-gated ion channel            | 0.0          | 0 / 1                 |
| Cyclooxygenase-2 (by homology)                 | Ptgs2       | P35355     | CHEMBL2977    | Family A G protein-coupled receptor | 0.0          | 2 / 7                 |
| Sucrase-isomaltase                             | Si          | P23739     | CHEMBL3114    | Family A G protein-coupled receptor | 0.0          | 1 / 1                 |
| Mu opioid receptor                             | Oprm1       | P33535     | CHEMBL270     | Family A G protein-coupled receptor | 0.0          | 1 / 3                 |
| Telomerase reverse transcriptase (by homology) | Tert        | Q673L6     | CHEMBL3108654 | Enzyme                              | 0.0          | 1 / 1                 |
| Glycogen synthase kinase-3 beta (by homology)  | Gsk3b       | P18266     | CHEMBL3669    | Protease                            | 0.0          | 1 / 6                 |
